1 **Combinatory therapy targeting mitochondrial oxidative phosphorylation improves**  
2 **efficacy of IDH mutant inhibitors in acute myeloid leukemia**

3  
4 Lucille Stuani<sup>1</sup>, Marie Sabatier<sup>1</sup>, Feng Wang<sup>2</sup>, Nathalie Poupin<sup>3</sup>, Claudie Bosc<sup>1</sup>, Estelle  
5 Saland<sup>1</sup>, Florence Castelli<sup>4</sup>, Lara Gales<sup>5,6</sup>, Camille Montersino<sup>7</sup>, Emeline Boet<sup>1</sup>, Evgenia  
6 Turtoi<sup>8,9,10</sup>, Tony Kaoma<sup>11</sup>, Thomas Farge<sup>1</sup>, Nicolas Broin<sup>1</sup>, Clément Larrue<sup>1</sup>, Natalia Baran<sup>2</sup>,  
7 Marc Conti<sup>12</sup>, Sylvain Loric<sup>12</sup>, Pierre-Luc Mouchel<sup>1,13</sup>, Mathilde Gotanègre<sup>1</sup>, Cédric Cassan<sup>14</sup>,  
8 Laurent Fernando<sup>3</sup>, Guillaume Cognet<sup>1</sup>, Aliko Zavoriti<sup>1</sup>, Mohsen Hosseini<sup>1</sup>, Héléna Boutzen<sup>1</sup>,  
9 Kiyomi Morita<sup>2</sup>, Andrew Futreal<sup>2</sup>, Emeline Chu-Van<sup>4</sup>, Laurent Le Cam<sup>9,10</sup>, Martin Carroll<sup>15</sup>,  
10 Mary A. Selak<sup>15</sup>, Norbert Vey<sup>16</sup>, Claire Calmettes<sup>17</sup>, Arnaud Pigneux<sup>17</sup>, Audrey Bidet<sup>18</sup>, Rémy  
11 Castellano<sup>7</sup>, Francois Fenaille<sup>4</sup>, Andrei Turtoi<sup>8,9,10</sup>, Guillaume Cazals<sup>19</sup>, Pierre Bories<sup>20</sup>, Yves  
12 Gibon<sup>14</sup>, Brandon Nicolay<sup>21</sup>, Sébastien Ronseaux<sup>21</sup>, Joe Marszalek<sup>2</sup>, Courtney D. DiNardo<sup>2</sup>,  
13 Marina Konopleva<sup>2</sup>, Yves Collette<sup>7</sup>, Laetitia K. Linares<sup>9,10</sup>, Floriant Bellvert<sup>5,6</sup>, Fabien  
14 Jourdan<sup>3,6</sup>, Koichi Takahashi<sup>2</sup>, Christian Récher<sup>1,13</sup>, Jean-Charles Portais<sup>5,6</sup>, Jean-Emmanuel  
15 Sarry<sup>1\*</sup>

16  
17 <sup>1</sup>Centre de Recherches en Cancérologie de Toulouse, UMR1037, Inserm, Université de  
18 Toulouse 3 Paul Sabatier, Equipe Labellisée LIGUE 2018, F-31037 Toulouse, France.

19 <sup>2</sup>Departments of Leukemia and Genomic Medicine, The University of Texas, MD Anderson  
20 Cancer Center, Houston, TX 77030, USA.

21 <sup>3</sup>UMR1331 Toxalim, Université de Toulouse, INRA, ENVT, INP-Purpan, UPS, Toulouse,  
22 France.

23 <sup>4</sup>CEA/DSV/iBiTec-S/SPI, Laboratoire d'Etude du Métabolisme des Médicaments,  
24 MetaboHUB-Paris, F-91191 Gif-sur-Yvette, France.

25 <sup>5</sup>TBI, Université de Toulouse, CNRS, INRA, INSA, Toulouse, F-31077, France.

26 <sup>6</sup>MetaToul-MetaboHUB, National Infrastructure of Metabolomics and Fluxomics, Toulouse,  
27 F-31077, France.

28 <sup>7</sup>Aix-Marseille Univ, Inserm, CNRS, Institut Paoli-Calmettes, CRCM, Marseille, France.

29 <sup>8</sup>Inserm, U1194, Cancer Research Institute of Montpellier, Tumor Microenvironment Lab, F-  
30 34090 Montpellier, France

31 <sup>9</sup>Institut du Cancer de Montpellier, F-34090 Montpellier, France

32 <sup>10</sup>Université de Montpellier, F-34090 Montpellier, France.

33 <sup>11</sup>Proteome and Genome Research Unit, Department of Oncology, Luxembourg Institute of  
34 Health, L-1445 Strassen, Luxembourg.

35 <sup>12</sup>Inserm U955EQ7, IMRB, Créteil, France.

36 <sup>13</sup>Service d'Hématologie, Institut Universitaire du Cancer de Toulouse-Oncopole, CHU de  
37 Toulouse, F-31100 Toulouse, France.

38 <sup>14</sup>UMR1332 Biologie du Fruit et Pathologie, Plateforme Métabolome Bordeaux, INRA,  
39 Université de Bordeaux, F-33883 Villenave d'Ornon, France.

40 <sup>15</sup>Division of Hematology & Oncology, Department of Medicine, University of Pennsylvania,  
41 Philadelphia, PA 19104, USA.

42 <sup>16</sup>Institut Paoli-Calmettes and Aix-Marseille Université, Marseille, France.

43 <sup>17</sup>CHU Bordeaux, Service d'Hématologie Clinique, F-33000 Bordeaux, France.

44 <sup>18</sup>CHU Bordeaux, Service d'Hématologie Biologique, F-33000 Bordeaux, France.

45 <sup>19</sup>Laboratoire de Mesures Physiques, Université de Montpellier, F-34090 Montpellier, France.

46 <sup>20</sup>Réseau régional de Cancérologie Onco-Occitanie, Toulouse, France.

47 <sup>21</sup>Agios Pharmaceuticals, 88 Sydney St, Cambridge MA, USA.

48

49 \*Corresponding author: Jean-Emmanuel Sarry; Inserm, U1037, Centre de Recherches en  
50 Cancérologie de Toulouse, F-31024 Toulouse cedex 3, France; Email: jean-  
51 emmanuel.sarry@inserm.fr; Phone: +33 582 74 16 32

52

53 **Running Title:** IDH and OxPHOS inhibitors

54

55

56 **Isocitrate dehydrogenases (IDH) are involved in redox control and central metabolism.**  
57 **Mutations in IDH induce epigenetic and transcriptional reprogramming, differentiation**  
58 **bias, BCL-2 dependence and susceptibility to mitochondrial inhibitors in cancer cells.**  
59 **Here we show that high sensitivity to mitochondrial oxidative phosphorylation**  
60 **(OxPHOS) inhibitors is due to an enhanced mitochondrial oxidative metabolism in cell**  
61 **lines, PDX and patients with acute myeloid leukemia (AML) harboring IDH mutation.**  
62 **Along with an increase in TCA cycle intermediates, this AML-specific metabolic**  
63 **behavior mechanistically occurs through the increase in methylation-driven CEBP $\alpha$ -**  
64 **and CPT1a-induced fatty acid oxidation, electron transport chain complex I activity and**  
65 **mitochondrial respiration in IDH1 mutant AML. Furthermore, an IDH mutant**  
66 **inhibitor that significantly and systematically reduces 2-HG oncometabolite transiently**  
67 **reverses mitochondrial FAO and OxPHOS gene signature and activities in patients who**  
68 **responded to the treatment and achieved the remission. However, at relapse or in**  
69 **patients who did not respond, IDH mutant inhibitor failed to block these mitochondrial**  
70 **properties. Accordingly, OxPHOS inhibitors such as IACS-010759 improve anti-AML**  
71 **efficacy of IDH mutant inhibitors alone and in combination with chemotherapy *in vivo*.**  
72 **This work provides a scientific rationale for combinatory mitochondrial-targeted**  
73 **therapies to treat IDH mutant-positive AML patients, especially those unresponsive to**  
74 **or relapsing from IDH mutant-specific inhibitors.**

75

76

77 Changes in intermediary and energy metabolism provide the flexibility for cancer cells to  
78 adapt their metabolism to meet energetic and biosynthetic requirements for proliferation<sup>1-4</sup>.  
79 Manipulating glycolysis, glutaminolysis, fatty acid  $\beta$ -oxidation (FAO) or oxidative  
80 phosphorylation (OxPHOS) markedly reduces cell growth *in vitro* and *in vivo* and sensitizes  
81 acute myeloid leukemia (AML) cells to chemotherapeutic drugs<sup>5-13</sup>. The importance of the  
82 metabolic reprogramming in this disease is further illustrated by recurrent mutations in genes  
83 of two crucial metabolic enzymes, isocitrate dehydrogenases (IDH) 1 and 2, present in more  
84 than 15% of AML patients<sup>14-17</sup>.

85 The impact of IDH mutation and the related accumulation of the oncometabolite (R)-2-  
86 hydroxyglutarate (2-HG) have been well documented in leukemic transformation and AML  
87 biology<sup>18-28</sup>. As IDH mutations are early events in oncogenesis and are systematically  
88 conserved at relapse<sup>29-31</sup>, IDH1/2 mutated (IDHm) enzymes represent attractive therapeutic  
89 targets and small molecules specifically inhibiting the mutated forms of these enzymes have  
90 been developed and recently approved by the FDA<sup>32-41</sup>. Both the IDH2m- and IDH1m-  
91 inhibitors promote differentiation and reduce methylation levels as well as significantly  
92 decrease 2-HG levels<sup>33,36,37,42,43</sup>. Overall response rates for ivosidenib (IDH1m inhibitor) and  
93 enasidenib (IDH2m inhibitor) are highly encouraging up to 30 or 40% in monotherapy in  
94 phase I/II clinical trials for newly diagnosed or relapsed/refractory AML patients  
95 respectively). However, several mechanisms of resistance to these targeted therapies have  
96 been already identified<sup>37-39,42,44</sup>. Moreover, suppression of serum 2-HG level alone did not  
97 predict response in patients, as many non-responders also displayed a significant decrease in  
98 the amount of 2-HG<sup>37,40,42,44-47</sup>. Importantly, multiple pathways involved in signaling, clonal  
99 heterogeneity or second-site mutation are very recently considered to be responsible for  
100 relapses in patients treated with IDH mutant inhibitors<sup>38,48-50</sup>. Thus, targeting IDH mutant

101 activity is not sufficient to achieve a durable clinical response in most patients and new  
102 combinatory approaches need to be designed.

103         Given the crucial roles of wild type (WT) IDH1/2 in cell metabolism (e.g. Krebs cycle,  
104 OxPHOS, cytosolic and mitochondrial redox, anabolism including lipid biosynthesis) and in  
105 human disease<sup>51</sup>, a better understanding of the contribution of oncogenic IDH mutations to  
106 metabolism and metabolic homeostasis is expected to lead to new therapeutic strategies.  
107 Several studies have demonstrated that IDH mutant cancer cells exhibit some metabolic  
108 specificities<sup>52-58</sup>. However, none of these studies have definitively shown how metabolic  
109 changes elicited by IDH mutations modulate cell proliferation and drug resistance or impact  
110 therapeutic response in AML. In particular, the role of metabolism in resistance to IDHm  
111 inhibitors has not been yet comprehensively studied in AML. Although existing literature in  
112 the field described several vulnerabilities to mitochondrial inhibitors in IDH1/2-mutant cells  
113 from solid tumors and AML<sup>9,59-62</sup>, no studies have also fully demonstrated why IDH mutant  
114 cells are more sensitive to mitochondrial inhibitors in AML. We therefore hypothesized that  
115 mitochondrial oxidative phosphorylation plays a crucial role in IDH mutant biology and in the  
116 response of AML patients with IDH mutation to IDHm inhibitors.

117         In the present study, we perform multi-omics and functional approaches using 2  
118 engineered AML cell lines, 12 PDX models from two clinical sites (Toulouse Hospital and  
119 University of Pennsylvania) and 123 patient samples from four clinical sites (Toulouse  
120 Hospital TUH, Bordeaux Hospital BUH, Marseille Hospital IPC and MD Anderson Cancer  
121 Center MDACC) to test this hypothesis and to expressly understand the mitochondrial  
122 reprogramming induced by IDH1 mutation and its role in the response to IDH mutant specific  
123 inhibitors.

124

125 **Results**

126 **A higher susceptibility of IDH1 mutant AML cells to mitochondrial inhibitors is due to**  
127 **their enhanced OxPHOS activity.** First we confirmed a higher sensitivity of IDH1/2-mutant  
128 cells from primary AML patient samples (WT, n=64; MUT, n=56; TUH, BUH, IPC,  
129 MDACC; Supplementary Table 1) and two genetically diverse cell lines to mitochondrial  
130 inhibitors such as OxPHOS inhibitors, including a new electron transport chain (ETC)  
131 complex I inhibitor IACS-010759<sup>63</sup> and metformin, ETC complex III (antimycin A, AA;  
132 atovaquone, ATQ), ETC complex V (oligomycin, OLIGO) or BCL2 inhibitors (ABT-199,  
133 ABT-263) (Fig. 1a-c and Supplementary Fig. 1a). Interestingly, their 2-HG response was  
134 heterogeneous (Fig. 1d). Whereas metformin induced an increase in 2-HG content, the BCL2  
135 inhibitor ABT-199 caused a reduction in the amount of the oncometabolite. This strongly  
136 suggests an enhancement of mitochondrial metabolic dependency in IDH mutant subgroup of  
137 AML patients without a systematic correlation with 2-HG content.

138 To better understand why IDH1 mutant cells have a higher sensitivity to mitochondrial  
139 inhibition, we extensively analyzed several biochemical, enzymatic and functional features  
140 relative to mitochondrial activity in IDH1 mutant *versus* WT AML cells from two genetically  
141 diverse AML cell lines *in vitro* and six patient-derived xenografts *in vivo* (Supplementary Fig.  
142 1b). Mitochondrial membrane potential, oxygen consumption, ATP-linked respiration and  
143 ATP content were all significantly enhanced in IDH mutant AML cells *in vitro* and *in vivo*  
144 (Fig. 1e-g and Supplementary Fig. 1c-e). Importantly, ETCI complex (and not other ETC  
145 complexes) activity, NADH-producing enzyme activity of TCA enzymes such as malate  
146 dehydrogenase (MDH2) and isocitrate dehydrogenase (IDH3) and concentration of Krebs  
147 cycle intermediates (except  $\alpha$ -KG) were also increased in IDH1 mutant AML cells (Fig. 1h-j),  
148 indicating an increase in mitochondrial NADH availability, mitochondrial activities and  
149 OxPHOS dependency specifically in IDH1 mutant AML cells. Interestingly, this was not due  
150 to an increase in mitochondrial biogenesis as shown by mitochondrial mass, protein content of

151 ETC complexes, citrate synthase activity or ratio between mitochondrial and nucleic DNA,  
152 which were not affected (Supplementary Fig. 1f-j).

153 Drug-resistant cancer cells have recently shown to be enriched in cells exhibiting a high  
154 OxPHOS signature and enhanced mitochondrial function in several cancers including myeloid  
155 malignancies<sup>11,12,64,65</sup>. Accordingly, we observed that IDH1 mutant cells were more resistant  
156 to conventional cytarabine (AraC) chemotherapy than IDH1 WT cells *in vitro* and in three  
157 PDX models *in vivo* that are low responders (Fig. 1k and Supplementary Fig. 1k), as  
158 previously defined to distinguish patients with high from low AraC response *in vivo*<sup>11</sup>.

159

160 **Methylation- and CEBP $\alpha$ - dependent mitochondrial FAO is increased in IDH1 mutant**  
161 **cells.** In order to further identify the mitochondrial reprogramming induced by IDH1  
162 mutation, we next performed a computational analysis of the metabolic network of IDH1  
163 mutant cells based on human genome scale metabolic network reconstruction Recon2 (7440  
164 metabolic reactions)<sup>66</sup>. To reconstruct active leukemic metabolic networks of IDH1 WT and  
165 mutant AML cells at a global level, we integrated transcriptomic data and applied metabolic  
166 constraints according to metabolite production and consumption rates measured in the  
167 corresponding cell culture supernatants (exometabolome)<sup>67,68</sup> (Fig. 2a). This analysis  
168 identified a significant enrichment of active reactions in various carbon metabolic pathways  
169 (N-glycan synthesis, fructose and mannose metabolism, dicarboxylate metabolism; Fig. 2a) in  
170 IDH1 mutant cells and predicted a major change in FAO in these cells (Fig. 2a-b), especially  
171 CPT1 which is required to initiate the transfer of fatty acids from the cytosol to the  
172 mitochondrial matrix for oxidation (Supplementary Fig. 2a). This prediction prompted us to  
173 assess key features of FA utilization in AML cells and patients with IDH1 mutation. First, we  
174 measured acyl-CoAs as readout of FA catabolism. As expected, acetyl-CoA, succinyl-CoA,

175 free coenzyme A and FA oxidation rate were significantly increased in IDH1 mutant AML  
176 cells (Fig. 2c-d).

177 The regulation of FAO is complex and involves different signaling pathways and allosteric  
178 regulation (Supplementary Fig. 2a). We first examined AMP kinase (AMPK), a master  
179 regulator of energy and metabolic homeostasis. Surprisingly, whereas the AMPK protein  
180 level was increased in IDH1 mutant cell lines and patients, its activation by phosphorylation  
181 was not increased (Fig. 2b). Furthermore, we did not observe an increase in the AMP/ATP  
182 ratio in mutants compared to WT (Supplementary Fig. 2c), suggesting that AMP, the primary  
183 allosteric activator of AMPK, does not directly activate AMPK in these cells. No increase in  
184 ADP/ATP ratio was detected, suggesting that neither AMP nor ADP enhanced the canonical  
185 phosphorylation of AMPK Thr172 *via* LKB1 in IDH1 mutant AML cells (Supplementary Fig.  
186 2c). These data showed that AMPK is not activated directly by AMP or *via* phosphorylation  
187 in mutant cells, indicating that the changes seen in FAO in mutant cells reflect an AMPK-  
188 independent mechanism. Similarly, the PKA pathway did not appear to be differentially  
189 activated and to be involved into the FAO regulation (Supplementary Fig. 2d). Interestingly,  
190 protein levels and phosphorylation of both acetyl-CoA carboxylases (ACC1 and ACC2) that  
191 regulate malonyl-CoA level and hence modulate mitochondrial FA shuttling and oxidation,  
192 were decreased in IDH1 mutant AML cells and therefore favor FAO (Supplementary Fig. 2e).  
193 Transcriptomic data using two independent AML cohorts (GSE 14468<sup>69</sup> and TCGA<sup>70</sup>)  
194 reinforced this observation demonstrating a significant decrease in *ACACA* (coding ACC1)  
195 and *ACACB* (coding ACC2) mRNA expression in IDH1 mutant cells (Supplementary Fig. 2f).  
196 Moreover, previous reports have shown that gene expression is closely modulated by histone  
197 and DNA methylation in IDH mutant cells<sup>18,71,72</sup>. To address the importance of histone  
198 methylation at the *ACACA* promoter, we performed quantitative chromatin  
199 immunoprecipitation (qChIP) experiments to measure the levels of trimethylation of lysine 4



200 of histone H4 (H3K4me3) and of trimethylation of lysine 27 of histone H3 (H3K27me3), two  
201 epigenetic markers associated with transcriptional activation and repression, respectively.  
202 While we did not observe any differences in H3K4me3 occupancy of the *ACACA* promoter, a  
203 significant increase in H3K27me3 on *ACACA* occurred specifically in IDH1 mutant cells  
204 (Supplementary Fig. 2g). Furthermore, we performed a gene set enrichment analysis (GSEA)  
205 with a curated FAO gene signature<sup>73</sup> and found that this signature was enriched in IDH1  
206 mutant AML cells (Supplementary Fig. 2h). The most highly expressed gene in IDH1 mutant  
207 cells was the key component of FA shuttling into mitochondria *CPT1a*. Consistent with this,  
208 *CPT1a* and its isoform *CPT1b* mRNA levels were also significantly upregulated in our IDH1  
209 mutant cell lines and in two independent AML cohorts (Fig. 2e and Supplementary Fig. 2i).  
210 Also, CPT1A protein was significantly increased in total cell lysates and in mitochondria  
211 isolated from IDH1 mutant cells compared to IDH1 WT cells and in IDH1 mutant primary  
212 samples (Fig. 2f). Finally, GSEA analysis comparing the transcriptomes of AML patients  
213 with IDH WT, IDH1 or IDH1/2 mutation revealed higher enrichment of FA metabolism and  
214 OxPHOS gene signatures in CPT1a<sup>HIGH</sup> patients with IDH mutations in two-independent  
215 cohorts (Fig. 2g). This strengthens the observation that CPT1a plays a crucial role in FA  
216 metabolism and OxPHOS in IDH mutant AML cells.

217 We previously demonstrated that IDH1 mutation and its 2-HG product dysregulate  
218 CEBP $\alpha$ <sup>23</sup>, a well-known transcriptional regulator of several genes involved in glucose and  
219 lipid metabolism. Moreover, CEBP $\alpha$  was the second most highly expressed gene of the FAO  
220 gene signature in IDH1 mutant cells (Supplementary Fig. 2h). Thus, we performed qChIP  
221 assays to assess CEBP $\alpha$  binding to promoters of genes encoding FA transporters. We  
222 observed that the recruitment of endogenous CEBP $\alpha$  to promoter of *CPT1a*, *CPT2*, and  
223 *SLC25A20* that mediates the transport of acyl-carnitines of different length across the  
224 mitochondrial inner membrane from the cytosol to the mitochondrial matrix, increased

225 specifically in IDH1 mutant cells (Fig. 2h). Furthermore, CEBP $\alpha$  silencing led to a reduction  
226 of mitochondrial basal OCR as well as ATP-linked and FAO-coupled OCR in IDH1 WT and  
227 to a greater extent in IDH1 mutant AML cells (Supplementary Fig. 2j-k). Together, these  
228 results indicate that IDH1 mutant cells display a gene signature specific for FA shuttling and a  
229 high FAO activity in CPT1a- and CEBP $\alpha$ - dependent manner to support mitochondrial  
230 activity.

231

232 **Reduction of 2-HG with IDHm inhibitors transiently reverses the mitochondrial**  
233 **phenotype of IDH mutant AML cells.** As IDH mutant cells exhibited higher mitochondrial  
234 activity than WT cells, we investigated the impact of IDHm inhibitors (FDA approved  
235 ivosidenib AG-120 and its preclinical version AGI-5198 for IDH1 and enasidenib AG-221 for  
236 IDH2) on this OxPHOS phenotype. Because Phase I clinical trials NCT02074839 or  
237 NCT01915498 showed 40% overall response rate for ivosidenib or enasidenib monotherapy  
238 for IDH mutant AML patients with relapsed or refractory AML, respectively<sup>38,39</sup>, we reasoned  
239 that non-responders in this study might have different mitochondrial and FAO status.  
240 Interestingly, we performed comparative transcriptomic analyses of IDH mutant patients  
241 characterized as good responders to IDHm inhibitor at complete remission (bone marrow  
242 blast < 5% and normalization to peripheral blood count; n=6 patients) *versus* before treatment  
243 and at relapse post-IDHm inhibitor *versus* at complete remission. We thus shown that curated  
244 gene signature related to OxPHOS, Krebs cycle, FAO and pyruvate metabolism were  
245 enriched in patients before treatment and upon relapse (Fig. 3a). Furthermore, these gene  
246 signatures were significantly enriched after IDHm inhibitor treatment in two IDH mutant  
247 patients who did not respond to IDHm inhibitor (Fig. 3a). In particular, the expression of the  
248 FAO genes *CPT1a*, *CPT2*, *SLC25A20* was significantly reduced in good responders to IDHm  
249 inhibitor at complete remission compared to before treatment but then increased at relapse to

250 reach the same level as before treatment (Fig. 3b). In two AML cell lines harboring IDH1  
251 mutation, AG-120 and AGI-5198 treatments significantly reduced 2-HG levels and decreased  
252 the expressions of *CEBP $\alpha$* , *CPT1a*, *CPT2* and *SLC25A20* (Supplementary Fig. 3a-b).  
253 Furthermore, IDH1m inhibitors prevented the recruitment of endogenous CEBP $\alpha$  to promoter  
254 of *CPT1a*, *CPT2* and *SLC25A20* (Supplementary Fig. 3c). As FAO is one of the major  
255 biochemical pathways that support OxPHOS and mitochondrial function especially in  
256 AML<sup>5,11,74</sup>, it was surprising to observe that IDH1m inhibitor maintained or even increased  
257 FAO-coupled (Fig. 3c), basal mitochondrial (Fig. 3d) and ATP-linked OCR (Fig. 3e). We  
258 then assessed several mitochondrial activities after treatment with IDHm inhibitors. IDH1m  
259 inhibitors also maintained or increased mitochondrial response in both IDH1 mutant cell lines  
260 such as their mitochondrial membrane potential (Supplementary Fig. 3d), TCA cycle  
261 intermediate concentrations (Fig. 3f), ETC complex activities or protein amounts  
262 (Supplementary Fig. 3e-g). Altogether, these results demonstrated that, while decreasing the  
263 level of 2-HG and some FAO features, IDHm inhibitors only transiently reverse OxPHOS  
264 phenotype, leading us to specifically consider combination with OxPHOS inhibitor for these  
265 patients.

266

267 **Treatment with OxPHOS inhibitors enhances anti-leukemic effects of IDH-mutant**  
268 **specific inhibitors alone and in combination with cytarabine.** We assessed several mono,  
269 duplet or triplet therapeutic approaches *in vivo* with IDHm inhibitor AG-120 (150 mg/kg,  
270 twice every day, 3 weeks), ETC complex I inhibitor IACS-010759 (8 mg/kg, every other day,  
271 3 weeks) or/and AraC (30 mg/kg, every day, 1 week) in two IDH1 R132 PDX models with  
272 variable engraftment capacity (high engrafting patient #325 in Fig. 4a-b, Supplementary Fig.  
273 4; low engrafting patient #1065 in Supplementary Fig. 5a). The level of 2-HG was greatly  
274 reduced in the PDX sera upon all therapies compared to control group while  $\alpha$ -KG remained

275 unchanged in PDX #325 (Fig 4c and Supplementary Fig. 4a). Total cell tumor burden was  
276 significantly reduced in mono, duplet and triplet therapy with a greater effect in the triplet  
277 therapy cohort compared to vehicle cohort or AraC monotherapy (Fig. 4d). Similarly,  
278 apoptosis was also increased in all treatments except AG-120 mono and duplet therapy with  
279 IACS and we observed a greater significance in the triplet therapy compared to vehicle  
280 (Supplementary Fig. 4b). Expression of the myeloid differentiation marker CD15 was also  
281 significantly increased in duplet therapy combining AraC and IACS and even more in the  
282 triplet therapy (Fig 4e and Supplementary Fig. 4c). Interestingly, mitochondrial OxPHOS  
283 function assessed *in vivo* by mitochondrial membrane potential was only decreased in the  
284 triplet therapy (Supplementary Fig. 4d). Furthermore, mitochondrial ATP content and  
285 respiratory capacities were increased after AraC or AG-120 alone or combined together but  
286 rescued with the addition of IACS in the triplet therapy *in vivo* (Fig. 4f and Supplementary  
287 Fig. 4e-g). Analysis of mice serum metabolomes showed that aspartate level was significantly  
288 reduced in all AraC groups, in particular in the duplet therapy with AG-120 and the triplet  
289 therapy. Lactate level was enhanced in all groups with IACS including the triplet therapy as  
290 key biomarker of IACS-010759 response (Fig. 4g). Similar *in vivo* experiments with lower  
291 engrafting IDH1-R132 PDX showed a lower level in anti-leukemic and biological effects of  
292 the mono, duplet and triplet combinations (Supplementary Fig. 5). However and more  
293 importantly in this low responder PDX, the triplet therapy induces a greater decrease in the  
294 total cell tumor burden, in mitochondrial activity through decreased mitochondrial membrane  
295 potential, mitochondrial ATP and enhanced lactate amount in mice sera (Supplementary Fig.  
296 5b-e). Of note, global toxicity of the triplet therapy or duplet therapies with AraC was  
297 primarily driven by AraC toxicity (Supplementary Fig. 4h-i and Fig. 5f-g). Altogether, these  
298 results not only confirmed that IDHm inhibitor does not necessarily reverse metabolic and  
299 mitochondrial (especially, enhanced OxPHOS phenotype) features of IDH mutant cells *in*

300 *vivo* but also that combining this drug with ETC complex I inhibitor in presence or not of  
301 standard AraC chemotherapy increases its drug efficacy *in vivo*, notably by inducing a Pasteur  
302 effect (e.g. increased lactate in response to the inhibition of mitochondrial ATP production).  
303 Finally, taking advantage of this preclinical study, we have identified a set of metabolic  
304 changes (here called AML metabolic profiling) that represent a combination of classic  
305 hallmarks of the Pasteur effect and other metabolic adaptations to predict the response to IDH  
306 *plus* OxPHOS inhibitors (Supplementary Fig. 6 and Supplementary Table 2) and to monitor  
307 the efficacy of their response (Supplementary Table 3) in IDH mutant AML subgroup.

308

### 309 **Discussion**

310 Since the discovery of IDH mutations in various cancers, significant efforts have been  
311 directed to understand the extent to which these oncogenic mutations directly impact  
312 metabolism, histone/DNA methylation and gene expression<sup>18,26,27,75-78</sup>, cell proliferation and  
313 differentiation bias<sup>19,21-23,34</sup>. However, questions remain unanswered related to the impact of  
314 IDH mutation on mitochondrial energetic metabolism in IDH mutant cells. Here we address  
315 several aspects of these different crucial points in IDH mutant cell biology and explain  
316 mitochondrial dependency in the basal condition and upon IDHm inhibitor treatment. IDH  
317 mutation induces mitochondrial reprogramming that contributes to maintain the pool of  $\alpha$ -KG  
318 to support 2-HG production and to replenish other Krebs cycle intermediates necessary for  
319 anabolic reactions, oxygen consumption and ATP production by oxidative phosphorylation in  
320 AML (Fig. 4h). Importantly, treatment with IDHm inhibitors transiently reverses FAO and  
321 OxPHOS activities that are maintained or enhanced in non-responders or at relapse (Fig. 4h).

322 Several studies in different cancers have consistently shown increased mitochondrial  
323 phenotypes in IDH mutant cells<sup>59,61,79,80</sup>. Our study helps to explain the dependence of IDH  
324 mutant cells on mitochondria and energetic metabolism required to sustain mutant cell

325 proliferation, in particular for synthesis of  $\alpha$ -KG and NADPH, the substrates of mutant IDH  
326 enzyme activity. It is noteworthy that disturbances in cellular and mitochondrial metabolism  
327 can contribute to the chemoresistance of AML cells<sup>5,6,11</sup>. Here we showed that IDH1 mutant  
328 AML cells exhibited a higher OxPHOS phenotype than WT cells, consistent with a lower  
329 response to AraC. We also observed a OxPHOS hyperactivity of IDH mutant cells and  
330 confirmed a strong ETC1 complex dependency in AML<sup>7,11,63,81,82</sup>. Accordingly, mutant AML  
331 cells exhibit enhanced vulnerabilities to various small molecules targeting mitochondrial  
332 OxPHOS such as inhibitors of ETC complex I, III and V. Consistent with literature reports  
333 and current clinical trials, we also observed that IDHm AML cells were more sensitive to  
334 BCL2 inhibition by ABT-199<sup>20,62,83</sup>. Several combinations of BCL2i with newly approved  
335 targeted therapies such as FLT3i and IDHi are under clinical assessment (NCT03735875 and  
336 NCT03471260, respectively). Interestingly, 2-HG levels did not correlate with apoptosis in  
337 these experiments, as its concentration decreased after ABT-199 while it increased after  
338 metformin treatment, a result already observed in IDH1 R132H transformed mammary  
339 epithelial cells<sup>61</sup>. This lack of correlation between cellular concentration of 2-HG, cell  
340 survival and sensitivity to various inhibitors is of particular interest as it has been shown that  
341 neither did inhibitors of mutant IDH reverse all IDH-mutant phenotypes nor did suppression  
342 of 2-HG alone predict response to IDHm inhibitors<sup>33,44,45,59,84,85</sup>. Our data and previous reports  
343 clearly show that 2-HG is essential but insufficient in mediating and mimicking all the  
344 complex metabolic consequences of IDH mutation<sup>56,86</sup>. These observations strongly suggest  
345 that innovative combinatory therapies might be useful in this patient subgroup. Of particular  
346 interest, whereas IDHm inhibitors maintain or increase mitochondrial and OxPHOS activity  
347 in IDH mutant cell lines and primary patients *in vitro*, *in vivo* and in relapsed or refractory  
348 AML patients in clinical trials, triplet combination using IDH1m inhibitor, OxPHOS inhibitor  
349 (such as IACS-010759), and AraC showed promising effects in IDH1 mutant AML PDX.

350 Therefore, this triplet drug combination may represent a beneficial alternative for AML  
351 patients unresponsive to IDH mutant-specific inhibitors.

352 In this regard, transcriptomic analysis before administration of an IDHm inhibitor in AML  
353 patients with IDH mutation, at complete remission and at relapse and in patients who did not  
354 respond to the drug revealed an enrichment in FAO and OxPHOS gene signatures at relapse  
355 and in non-responders. In particular, expression of several genes participating in FAO such as  
356 *CPT1a*, *CPT2* and *SLC25A20* correlate with relapse and response to IDHm inhibitor and  
357 could potentially be used in clinics to predict and monitor the therapeutic efficacy of IDHm  
358 and OxPHOS inhibitors. Moreover, we observed that lactate concentration in mice sera was  
359 not modified and that mitochondrial ATP was maintained or increased by treatment with  
360 IDH1m inhibitor alone while duplet or triplet therapies with OxPHOSi lead to significant  
361 increase in lactate concentration and reduction in mitochondrial ATP in our high responder  
362 PDX harboring IDH1 mutation. Accordingly, we proposed an AML metabolic profiling based  
363 on measuring mitochondrial ATP, OxPHOS and FAO gene signatures from primary cells, and  
364 lactate, aspartate and 2-HG in the sera of patients. This could represent a potentially powerful  
365 tool in identifying and understanding dependence on individual mitochondrial FAO and  
366 OxPHOS activities. Consequently, this combination of metabolic and genetic approaches can  
367 also be used to predict and monitor responses to the duplet or triplet therapy combining IDHi  
368 and OxPHOSi (Supplementary Fig. 6, Supplementary Table 2 and Supplementary Table 3) in  
369 the context of the functional precision cancer medicine<sup>87,88</sup>.

370 Of particular interest, it was very recently shown that for patients with IDH1 or IDH2  
371 mutation who responded to IDHm inhibitors in clinics and then relapsed, acquired resistance  
372 to this molecularly targeted therapy was caused by the emergence of clones with a second-  
373 side IDH mutation in the wild type IDH allele without the initial IDH mutation, rescuing 2-  
374 HG production<sup>48</sup>. This reinforced the therapeutic interest/potential of our combinatory

375 strategy. Finally, our study supports the merit of future clinical trials testing the combination  
376 of IDHm inhibitors and mitochondrial inhibitors with cytarabine treatment. Because this  
377 proposed therapeutic strategy will overcome different newly identified mechanisms of  
378 resistance to IDH mutant inhibitors<sup>38,48,49</sup>, this would be especially relevant as alternative  
379 therapeutic approaches for the treatment of those patients that are not unresponsive to or  
380 relapsing from IDH mutant-specific inhibitors.

381

## 382 **Methods**

### 383 **Primary AML samples**

384 Primary AML patient specimens are from five clinical sites [University of Pennsylvania  
385 (UPENN), Philadelphia, PA; MD Anderson Cancer Center at University of Texas, Houston,  
386 (MDACC), Toulouse University Hospital (TUH), Toulouse, France, Institut Paoli-Calmettes  
387 (IPC), Marseille, France and Bordeaux University Hospital (BUH), Bordeaux, France].

388 For TUH and BUH, frozen samples of bone marrow or peripheral blood were obtained from  
389 patients diagnosed with AML after signed informed consent in accordance with the  
390 Declaration of Helsinki, and stored at the HIMIP collection (BB-0033-00060) and CRB-K  
391 BBS (BB-0033-00036). According to the French law, HIMIP biobank collection and BBS  
392 biobank have been declared to the Ministry of Higher Education and Research (DC 2008-307,  
393 collection 1 for HIMIP and DC 2014-2164 for BBS) and obtained a transfer agreement (AC  
394 2008-129) after approbation by the Comité de Protection des Personnes Sud-Ouest et  
395 Outremer II (ethical committee). Clinical and biological annotations of the samples have been  
396 declared to the CNIL (Comité National Informatique et Libertés ie Data processing and  
397 Liberties National Committee). For IPC clinical site, *ex vivo* drug sensitivity was performed  
398 on previously frozen (HEMATO-BIO-IPC 2013--015 clinical trial, NCT02320656) or fresh  
399 (CEGAL-IPC-2014-012, NCT02619071 clinical trial) mononuclear cell samples from 49



400 AML patients after informed consent (Supplementary Table 1). Both trials have been  
401 approved by a properly constituted Institutional Review Board (Comité de Protection des  
402 Personnes) and by the French National Security Agency of Medicine and Health Products  
403 (ANSM). The samples are subjected to NGS to screen for mutations within a selected panel of  
404 ~150 actionable genes in AML (i.e.) known to be of prognostic value and/or druggable. For  
405 UPENN, AML samples were obtained from patients diagnosed with AML in accordance with  
406 U.S. Common Rules at the Stem Cell and Xenograft Core Facility at the UPENN School of  
407 Medicine and with informed consent in accordance with institutional guidelines. Peripheral  
408 blood or bone marrow samples were frozen in FCS with 10% DMSO and stored in liquid  
409 nitrogen. The percentage of blasts was determined by flow cytometry and morphologic  
410 characteristics before purification. For MDACC cohort, bone marrow samples were collected  
411 from the 11 AML patients who were treated with AG-120 (n=6) and AG-221 (n=5) in The  
412 University of Texas MD Anderson Cancer Center from clinical trials NCT01915498  
413 (enasidenib AG-221 for IDH2 mutated patients), NCT02074839 (ivosidenib AG-120 for  
414 IDH1 mutated patients). All patients had provided written informed consent for sample  
415 collection and subsequent data analysis. Nine patients had achieved complete remission  
416 (responders; n = 9), and 2 patients never achieved remission (non-responders; n=2). For a  
417 subset of responders, longitudinal samples were obtained at pre-treatment (n = 8), complete  
418 remission (n = 6), and at the time of relapse (n = 5). For non-responders (n=2), we analyzed  
419 the paired bone marrow samples obtained at pre-treatment and post-treatment. These samples  
420 were analyzed by targeted capture next generation sequencing using SureSelect custom panel  
421 of 295 genes (Agilent Technologies, Santa Clara, CA, USA), as well as RNA sequencing.  
422 Bone marrow morphology and karyotyping data were interpreted by the board certified  
423 hematopathologists.

#### 424 **Mice and mouse xenograft model**

425 Animals were used in accordance with a protocol reviewed and approved by the Institutional  
426 Animal Care and Use Committee of Région Midi-Pyrénées (France). NOD/LtSz-SCID/IL-  
427 2Rγchainnull (NSG) mice were produced at the Genotoul Anexplo platform at Toulouse  
428 (France) using breeders obtained from Charles River Laboratories. Mice were housed in  
429 sterile conditions using high-efficiency particulate arrestance filtered microisolators and fed  
430 with irradiated food and sterile water.

431 Human primary AML cells were transplanted as reported previously <sup>11,89-91</sup>. Briefly, mice (6–  
432 9 weeks old) were sublethally treated with busulfan (20 mg/kg/day) 24 hours before injection  
433 of leukemic cells. Leukemia samples were thawed at room temperature, washed twice in PBS,  
434 and suspended in Hank's Balanced Salt Solution at a final concentration of 0.2-10x10<sup>6</sup> cells  
435 per 200μL of Hank's Balanced Salt Solution per mouse for tail vein injection. Transplanted  
436 mice were treated with antibiotic (Baytril) for the duration of the experiment. Daily  
437 monitoring of mice for symptoms of disease (ruffled coat, hunched back, weakness, and  
438 reduced mobility) determined the time of killing for injected animals with signs of distress. If  
439 no signs of distress were seen, mice were initially analyzed for engraftment 8 weeks after  
440 injection except where otherwise noted.

#### 441 ***In vivo* mice treatment**

442 Eight to 18 weeks (PDX) after AML cell transplantation and when mice were engrafted  
443 (tested by flow cytometry on peripheral blood or bone marrow aspirates), NSG mice were  
444 treated as described below:

- 445 • AraC treatment: NSG mice were treated by daily intraperitoneal injection of 60 mg/kg  
446 AraC for 5 days; AraC was kindly provided by the pharmacy of the TUH. For control,  
447 NSG mice were treated daily with intraperitoneal injection of vehicle, PBS 1X.
- 448 • IACS-10759 treatment: IACS-10759 was solubilized in water containing 0.5%  
449 methylcellulose before administration to mice. NSG mice were treated 3 times a week by

450 gavage of 8 or 5 mg/kg IACS-10759 (according to weight loss of mice) for 21 days. For  
451 control, NSG mice were treated by daily gavage of vehicle. IACS-10759 was kindly  
452 provided by Dr. Joe Marszalek.

453 • AG-120 treatment: AG-120 (Ivosidenib, AGIOS Pharmaceuticals) was solubilized in water  
454 containing 0.5% methylcellulose and 0.2% Tween80 before administration to mice. NSG  
455 mice were treated twice a day by gavage of 150mg/kg AG-120 for 21 days. For control,  
456 NSG mice were treated twice a day by gavage of vehicle.

457 Mice were monitored for toxicity and provided nutritional supplements as needed.

#### 458 **Assessment of Leukemic Engraftment**

459 Assessment of leukemic engraftment was measured as reported previously<sup>11</sup>. Briefly, NSG  
460 mice were humanely killed in accordance with European ethics protocols. Bone marrow  
461 (mixed from tibias and femurs) and spleen were dissected in a sterile environment and flushed  
462 in Hank's Balanced Salt Solution with 1% FBS. MNCs from peripheral blood, bone marrow,  
463 and spleen were labeled with hCD33-PE (555450), mCD45.1-PerCP-Cy5.5 (156058),  
464 hCD45-APC (5555485), and hCD44-PECy (7560533) (all antibodies from BD Biosciences)  
465 to determine the fraction of human blasts (hCD45<sup>+</sup>mCD45.1<sup>-</sup>hCD33<sup>+</sup>hCD44<sup>+</sup> cells) using  
466 flow cytometry. All antibodies used for cytometry were used at concentrations between 1/50  
467 and 1/200 depending on specificity and cell density. Analyses were performed on a  
468 CytoFLEX flow cytometer with CytoExpert software (Beckman Coulter) and FlowJo 10.2  
469 (Tree Star). The number of AML cells/ $\mu$ l peripheral blood and number of AML cells in total  
470 cell tumor burden (in bone marrow and spleen) were determined by using CountBright beads  
471 (Invitrogen) using described protocol.

#### 472 **Statistical analyses**

473 Statistical analyses were conducted using Prism software v6.0 (GraphPad Software, La Jolla,  
474 CA, USA). For *in vitro* and *in vivo* studies, statistical significance was determined by the two-

475 tailed unpaired Student's t-test. For transcriptomic analysis of cohorts, statistical significance  
476 was determined by the non-parametric Mann-Whitney test. A pvalue < 0.05 was considered  
477 statistically significant. For all figures, ns, not significant, \*p%0.05, \*\*p%0.01, \*\*\*p%0.001,  
478 \*\*\*\*p%0.0001. Unless otherwise indicated, all data represent the mean ± standard error of the  
479 mean (SEM) from at least three independent experiments. Box-and-whisker plots displays all  
480 the individual data points as well as the corresponding median. For metabolomic analysis,  
481 Seahorse and ATP assays, each biological replicates represents the mean of at least two  
482 technical replicates.

483

#### 484 **Data availability statement**

485 RNAseq data from Fig. 3 are part of a clinical trial and available upon request.

486

#### 487 **Acknowledgements**

488 We thank The CancéroPoles PACA and GSO, the Network MetaboCancerGSO, Karine  
489 Marendziak, all members of mice core facilities (UMS006, ANEXPLO, Inserm, Toulouse)  
490 for their support and technical assistance, and Audrey Sarry, Prof. Véronique De Mas and  
491 Eric Delabesse for the management of the Biobank BRC-HIMIP (Biological Resources  
492 Centres-Inserm Midi-Pyrénées “Cytothèque des hémopathies malignes”) that is supported by  
493 CAPTOR (Cancer Pharmacology of Toulouse-Oncopole and Région). We thank Anne-Marie  
494 Benot, Muriel Serthelon and Stéphanie Nevouet for their daily help about the administrative  
495 and financial management of the Sarry lab. We thank the Institut Paoli Calmettes Direction de  
496 la Recherche Clinique et de l'Innovation (DRCI), the Hematology Department, and the  
497 IPC/CRCM Biological Resource Center for sample collection and processing. We also thank  
498 patients and their families.

499 This work was also supported by grants from the Région Midi-Pyrénées (FLEXAML, J-E.S.),

500 the Plan Cancer Biologie des Systèmes 2014 (FLEXAML; J-E.S.), the Laboratoire  
501 d'Excellence Toulouse Cancer (TOUCAN; contract ANR11-LABEX), the Canceropole GSO  
502 (MetaboCancerGSO; J-E.S., J-C.P., L.L.C.) the Programme Hospitalo-Universitaire en  
503 Cancérologie (CAPTOR; contract ANR11-PHUC0001), La Ligue Nationale de Lutte Contre  
504 le Cancer, the Fondation ARC, the Fondation Toulouse Cancer Santé and the Association  
505 G.A.E.L. MetaTOUL (Metabolomics & Fluxomics Facilities, Toulouse, France,  
506 [www.metatoul.fr](http://www.metatoul.fr)) and LEMM are part of the national infrastructure MetaboHUB-ANR-11-  
507 INBS-0010 (The French National infrastructure for metabolomics and fluxomics,  
508 [www.metabohub.fr](http://www.metabohub.fr)). MetaToul is supported by grants from the Région Midi-Pyrénées, the  
509 European Regional Development Fund, the SICOVAL, the Infrastructures en Biologie Santé  
510 et Agronomie (IBiSa, France), the Centre National de la Recherche Scientifique (CNRS) and  
511 the Institut National de la Recherche Agronomique (INRA). The project has been partly  
512 supported by Canceropole PACA, SIRIC (grant INCa-Inserm-DGOS 6038 2012-  
513 2017), Canceropôle-SIRIC EmA, INCA 2017-024-COLLETTE and INCa 2017-024-MAL. C.  
514 M. was supported by SIRIC (grant INCa-Inserm-DGOS 6038 2012-2017) and Canceropôle-  
515 SIRIC EmA. E. T. was supported by SIRIC-Montpellier Cancer Program (grant INCa-Inserm-  
516 DGOS 6045 2012-2017). N. Ba. and M. K. were supported by funding from Leukemia Spore  
517 grant P50 (CA100632-16).

518

#### 519 **Author contributions**

520 L.S., M.S. and J-E.S designed experiments. L.S., M.S., C.B., E.S., T.F., N.Br., C.L., N. Ba.,  
521 M. Co., S.L., C.Cas., G.Co., A.Z., M.H., H.B., L.K.L. performed *in vitro* experiments. M.S.,  
522 C.B., E.S., E.B., T.F., P-L.M, M.G. performed *in vivo* experiments. C.M. and R.C. performed  
523 chemogrammes' analysis. L.S., F.C., L.G., E.T., E.C-V, A.T. and G. Ca. performed  
524 metabolomics analyses. N.P., L.F. and F.J. performed genome-scale metabolic network

525 analysis. L.S., T.F. and T.K. performed transcriptomic analysis on publically available  
526 cohorts. F.W., K.M., A.F. and K.T. performed and analyzed RNAseq analysis on patient  
527 samples treated with IDHm inhibitors. AML bone marrow and blood samples were provided  
528 by M.Ca. (UPENN), N.V. and Y.C. (IPC), C.Cal., A.P. and A.B. (BUH), P.B. and C.R.  
529 (TUH), C.D.D and M.K. (MDACC). J. M. and M.K provided IACS-010759. B.N. and S.R.  
530 provided and measured AG-120 in mice sera. L.L.C., F.F., A.T., Y.G., J.M., C.D.D, M.K.,  
531 L.K.L, F.B. and J-C.P managed the resources and shared their expertise. L.S. and J-E.S. wrote  
532 the manuscript and designed the figures. N.P., M.A.S., F.F., F.J., C.R. and J-C.P reviewed the  
533 manuscript. J-E-S directed the research.

534

#### 535 **Competing interests statement**

536 C.D.D. is a consultant for Agios and Celgene, and served on the advisory board for Bayer,  
537 Karyopharm, MedImmune, and AbbVie. S.R. and B.N. are both employees and own stock in  
538 Agios Pharmaceuticals.

539 The rest of the authors declare no competing interests.

540

#### 541 **References**

- 542 1. Borouhgs, L. K. & DeBerardinis, R. J. Metabolic pathways promoting cancer cell  
543 survival and growth. *Nat. Cell Biol.* **17**, 351–359 (2015).
- 544 2. Lehuédé, C., Dupuy, F., Rabinovitch, R., Jones, R. G. & Siegel, P. M. Metabolic  
545 Plasticity as a Determinant of Tumor Growth and Metastasis. *Cancer Res.* **76**, 5201–8  
546 (2016).
- 547 3. Martinez-Outschoorn, U. E., Peiris-Pagés, M., Pestell, R. G., Sotgia, F. & Lisanti, M.  
548 P. Cancer metabolism: a therapeutic perspective. *Nat. Rev. Clin. Oncol.* **14**, 11–31  
549 (2017).
- 550 4. Vander Heiden, M. G. & DeBerardinis, R. J. Understanding the Intersections between  
551 Metabolism and Cancer Biology. *Cell* **168**, 657–669 (2017).
- 552 5. Samudio, I. *et al.* Pharmacologic inhibition of fatty acid oxidation sensitizes human  
553 leukemia cells to apoptosis induction. *J. Clin. Invest.* **120**, 142–56 (2010).
- 554 6. Škrtić, M. *et al.* Inhibition of Mitochondrial Translation as a Therapeutic Strategy for  
555 Human Acute Myeloid Leukemia. *Cancer Cell* **20**, 674–688 (2011).
- 556 7. Scotland, S. *et al.* Mitochondrial energetic and AKT status mediate metabolic effects  
557 and apoptosis of metformin in human leukemic cells. *Leukemia* **27**, 2129–2138 (2013).
- 558 8. Jacque, N. *et al.* Targeting glutaminolysis has antileukemic activity in acute myeloid

- 559 leukemia and synergizes with BCL-2 inhibition. *Blood* **126**, 1346–56 (2015).
- 560 9. Matre, P. *et al.* Inhibiting glutaminase in acute myeloid leukemia: metabolic  
561 dependency of selected AML subtypes. *Oncotarget* **7**, 79722–79735 (2016).
- 562 10. Poulain, L. *et al.* High mTORC1 activity drives glycolysis addiction and sensitivity to  
563 G6PD inhibition in acute myeloid leukemia cells. *Leukemia* **31**, 2326–2335 (2017).
- 564 11. Farge, T. *et al.* Chemotherapy-Resistant Human Acute Myeloid Leukemia Cells Are  
565 Not Enriched for Leukemic Stem Cells but Require Oxidative Metabolism. *Cancer*  
566 *Discov.* **7**, 716–735 (2017).
- 567 12. Bosc, C., Selak, M. A. & Sarry, J.-E. Resistance Is Futile: Targeting Mitochondrial  
568 Energetics and Metabolism to Overcome Drug Resistance in Cancer Treatment. *Cell*  
569 *Metab.* **26**, 705–707 (2017).
- 570 13. Stuani, L., Sabatier, M. & Sarry, J.-E. Exploiting metabolic vulnerabilities for  
571 personalized therapy in acute myeloid leukemia. *BMC Biol.* **17**, 57 (2019).
- 572 14. Mardis, E. R. *et al.* Recurring Mutations Found by Sequencing an Acute Myeloid  
573 Leukemia Genome. *N. Engl. J. Med.* **361**, 1058–1066 (2009).
- 574 15. Abbas, S. *et al.* Acquired mutations in the genes encoding IDH1 and IDH2 both are  
575 recurrent aberrations in acute myeloid leukemia: prevalence and prognostic value.  
576 *Blood* **116**, 2122–6 (2010).
- 577 16. Marcucci, G. *et al.* IDH1 and IDH2 gene mutations identify novel molecular subsets  
578 within de novo cytogenetically normal acute myeloid leukemia: a Cancer and  
579 Leukemia Group B study. *J. Clin. Oncol.* **28**, 2348–55 (2010).
- 580 17. Paschka, P. *et al.* IDH1 and IDH2 mutations are frequent genetic alterations in acute  
581 myeloid leukemia and confer adverse prognosis in cytogenetically normal acute  
582 myeloid leukemia with NPM1 mutation without FLT3 internal tandem duplication. *J.*  
583 *Clin. Oncol.* **28**, 3636–43 (2010).
- 584 18. Figueroa, M. E. *et al.* Leukemic IDH1 and IDH2 Mutations Result in a  
585 Hypermethylation Phenotype, Disrupt TET2 Function, and Impair Hematopoietic  
586 Differentiation. *Cancer Cell* **18**, 553–567 (2010).
- 587 19. Sasaki, M. *et al.* D-2-hydroxyglutarate produced by mutant IDH1 perturbs collagen  
588 maturation and basement membrane function. *Genes Dev.* **26**, 2038–49 (2012).
- 589 20. Konopleva, M. *et al.* Efficacy and Biological Correlates of Response in a Phase II  
590 Study of Venetoclax Monotherapy in Patients with Acute Myelogenous Leukemia.  
591 *Cancer Discov.* **6**, 1106–1117 (2016).
- 592 21. Losman, J.-A. *et al.* (R)-2-hydroxyglutarate is sufficient to promote leukemogenesis  
593 and its effects are reversible. *Science* **339**, 1621–5 (2013).
- 594 22. Kats, L. M. *et al.* Proto-oncogenic role of mutant IDH2 in leukemia initiation and  
595 maintenance. *Cell Stem Cell* **14**, 329–41 (2014).
- 596 23. Boutzen, H. *et al.* Isocitrate dehydrogenase 1 mutations prime the all-trans retinoic acid  
597 myeloid differentiation pathway in acute myeloid leukemia. *J. Exp. Med.* **213**, 483–97  
598 (2016).
- 599 24. Inoue, S. *et al.* Mutant IDH1 Downregulates ATM and Alters DNA Repair and  
600 Sensitivity to DNA Damage Independent of TET2. *Cancer Cell* **30**, 337–348 (2016).
- 601 25. Elkashef, S. M. *et al.* IDH Mutation, Competitive Inhibition of FTO, and RNA  
602 Methylation. *Cancer Cell* **31**, 619–620 (2017).
- 603 26. Jiang, B. *et al.* IDH1 Mutation Promotes Tumorigenesis by Inhibiting JNK Activation  
604 and Apoptosis Induced by Serum Starvation. *Cell Rep.* **19**, 389–400 (2017).
- 605 27. Turcan, S. *et al.* Mutant-IDH1-dependent chromatin state reprogramming, reversibility,  
606 and persistence. *Nat. Genet.* **50**, 62–72 (2018).
- 607 28. Chan, S. M. *et al.* Isocitrate dehydrogenase 1 and 2 mutations induce BCL-2  
608 dependence in acute myeloid leukemia. *Nat. Med.* **21**, 178–184 (2015).

- 609 29. Corces-Zimmerman, M. R. & Majeti, R. Pre-leukemic evolution of hematopoietic stem  
610 cells: the importance of early mutations in leukemogenesis. *Leukemia* **28**, 2276–2282  
611 (2014).
- 612 30. Shlush, L. I. *et al.* Identification of pre-leukaemic haematopoietic stem cells in acute  
613 leukaemia. *Nature* **506**, 328–333 (2014).
- 614 31. Ok, C. Y. *et al.* Persistent IDH1/2 mutations in remission can predict relapse in patients  
615 with acute myeloid leukemia. *Haematologica* **104**, 305–311 (2019).
- 616 32. Popovici-Muller, J. *et al.* Discovery of the First Potent Inhibitors of Mutant IDH1 That  
617 Lower Tumor 2-HG *in Vivo*. *ACS Med. Chem. Lett.* **3**, 850–855 (2012).
- 618 33. Rohle, D. *et al.* An inhibitor of mutant IDH1 delays growth and promotes  
619 differentiation of glioma cells. *Science* **340**, 626–30 (2013).
- 620 34. Wang, F. *et al.* Targeted inhibition of mutant IDH2 in leukemia cells induces cellular  
621 differentiation. *Science* **340**, 622–6 (2013).
- 622 35. Okoye-Okafor, U. C. *et al.* New IDH1 mutant inhibitors for treatment of acute myeloid  
623 leukemia. *Nat. Chem. Biol.* **11**, 878–886 (2015).
- 624 36. Yen, K. *et al.* AG-221, a First-in-Class Therapy Targeting Acute Myeloid Leukemia  
625 Harboring Oncogenic IDH2 Mutations. *Cancer Discov.* **7**, 478–493 (2017).
- 626 37. Stein, E. M. *et al.* Enasidenib in mutant IDH2 relapsed or refractory acute myeloid  
627 leukemia. *Blood* **130**, 722–731 (2017).
- 628 38. DiNardo, C. D. *et al.* Durable Remissions with Ivosidenib in *IDH1* -Mutated Relapsed  
629 or Refractory AML. *N. Engl. J. Med.* NEJMoa1716984 (2018).  
630 doi:10.1056/NEJMoa1716984
- 631 39. Pollyea, D. A. *et al.* Enasidenib, an inhibitor of mutant IDH2 proteins, induces durable  
632 remissions in older patients with newly diagnosed acute myeloid leukemia. *Leukemia* **1**  
633 (2019). doi:10.1038/s41375-019-0472-2
- 634 40. Stein, E. M. *et al.* Molecular remission and response patterns in patients with mutant-  
635 IDH2 acute myeloid leukemia treated with enasidenib. *Blood* **133**, 676–687 (2019).
- 636 41. DiNardo, C. D. & Perl, A. E. Advances in patient care through increasingly  
637 individualized therapy. *Nat. Rev. Clin. Oncol.* **16**, 73–74 (2019).
- 638 42. DiNardo, C. *et al.* Molecular Profiling and Relationship with Clinical Response in  
639 Patients with IDH1 Mutation-Positive Hematologic Malignancies Receiving AG-120, a  
640 First-in-Class Potent Inhibitor of Mutant IDH1, in Addition to Data from the  
641 Completed Dose Escalation Portio.... *Blood* **126**, (2015).
- 642 43. De Botton, S., Pollyea, D. A. & Stein, E. M. Clinical safety and activity of AG-120, a  
643 first-in-class, potent inhibitor of the IDH1 mutant protein, in a phase 1 study of patients  
644 with advanced IDH1-mutant hematologic malignancies [abstract]. *Haematologica* **100**,  
645 214–215 (2015).
- 646 44. Amatangelo, M. D. *et al.* Enasidenib induces acute myeloid leukemia cell  
647 differentiation to promote clinical response. *Blood* **130**, 732–741 (2017).
- 648 45. Thomas, D. & Majeti, R. Optimizing Next-Generation AML Therapy: Activity of  
649 Mutant IDH2 Inhibitor AG-221 in Preclinical Models. *Cancer Discov.* **7**, 459–461  
650 (2017).
- 651 46. Waitkus, M. S., Diplas, B. H. & Yan, H. Biological Role and Therapeutic Potential of  
652 IDH Mutations in Cancer. *Cancer Cell* (2018). doi:10.1016/J.CCELL.2018.04.011
- 653 47. Jones, C. L. *et al.* Cysteine depletion targets leukemia stem cells through inhibition of  
654 electron transport complex II. *Blood* blood.2019898114 (2019).  
655 doi:10.1182/BLOOD.2019898114
- 656 48. Intlekofer, A. M. *et al.* Acquired resistance to IDH inhibition through trans or cis  
657 dimer-interface mutations. *Nature* **559**, 125–129 (2018).
- 658 49. Quek, L. *et al.* Clonal heterogeneity of acute myeloid leukemia treated with the IDH2



- 659 inhibitor enasidenib. *Nat. Med.* **1** (2018). doi:10.1038/s41591-018-0115-6
- 660 50. Harding, J. J. *et al.* Isoform Switching as a Mechanism of Acquired Resistance to  
661 Mutant Isocitrate Dehydrogenase Inhibition. *Cancer Discov.* **8**, 1540–1547 (2018).
- 662 51. Tommasini-Ghelfi, S. *et al.* Cancer-associated mutation and beyond: The emerging  
663 biology of isocitrate dehydrogenases in human disease. *Sci. Adv.* **5**, eaaw4543 (2019).
- 664 52. Tateishi, K. *et al.* Extreme Vulnerability of IDH1 Mutant Cancers to NAD<sup>+</sup> Depletion.  
665 *Cancer Cell* **28**, 773–784 (2015).
- 666 53. Fack, F. *et al.* Altered metabolic landscape in IDH-mutant gliomas affects  
667 phospholipid, energy, and oxidative stress pathways. *EMBO Mol. Med.* **9**, 1681–1695  
668 (2017).
- 669 54. Maus, A. & Peters, G. J. Glutamate and  $\alpha$ -ketoglutarate: key players in glioma  
670 metabolism. *Amino Acids* **49**, 21–32 (2017).
- 671 55. Hollinshead, K. E. R. *et al.* Oncogenic IDH1 Mutations Promote Enhanced Proline  
672 Synthesis through PYCR1 to Support the Maintenance of Mitochondrial Redox  
673 Homeostasis. *Cell Rep.* **22**, 3107–3114 (2018).
- 674 56. Gelman, S. J. *et al.* Consumption of NADPH for 2-HG Synthesis Increases Pentose  
675 Phosphate Pathway Flux and Sensitizes Cells to Oxidative Stress. *Cell Rep.* **22**, 512–  
676 522 (2018).
- 677 57. Zhou, L. *et al.* Integrated Metabolomics and Lipidomics Analyses Reveal Metabolic  
678 Reprogramming in Human Glioma with IDH1 Mutation. (2018).  
679 doi:10.1021/acs.jproteome.8b00663
- 680 58. Badur, M. G. *et al.* Oncogenic R132 IDH1 Mutations Limit NADPH for De Novo  
681 Lipogenesis through (D)2-Hydroxyglutarate Production in Fibrosarcoma Cells. *Cell*  
682 *Rep.* **25**, 1018-1026.e4 (2018).
- 683 59. Grassian, A. R. *et al.* IDH1 mutations alter citric acid cycle metabolism and increase  
684 dependence on oxidative mitochondrial metabolism. *Cancer Res.* **74**, 3317–31 (2014).
- 685 60. Izquierdo-Garcia, J. L. *et al.* Glioma Cells with the IDH1 Mutation Modulate  
686 Metabolic Fractional Flux through Pyruvate Carboxylase. *PLoS One* **9**, e108289  
687 (2014).
- 688 61. Cuyàs, E. *et al.* Oncometabolic mutation IDH1 R132H confers a metformin-  
689 hypersensitive phenotype. *Oncotarget* **6**, 12279–12296 (2015).
- 690 62. Chan, S. M. *et al.* Isocitrate dehydrogenase 1 and 2 mutations induce BCL-2  
691 dependence in acute myeloid leukemia. *Nat. Med.* **21**, 178–184 (2015).
- 692 63. Molina, J. R. *et al.* An inhibitor of oxidative phosphorylation exploits cancer  
693 vulnerability. *Nat. Med.* **24**, 1036–1046 (2018).
- 694 64. Kuntz, E. M. *et al.* Targeting mitochondrial oxidative phosphorylation eradicates  
695 therapy-resistant chronic myeloid leukemia stem cells. *Nat. Med.* **23**, 1234–1240  
696 (2017).
- 697 65. Lee, K.-M. *et al.* MYC and MCL1 Cooperatively Promote Chemotherapy-Resistant  
698 Breast Cancer Stem Cells via Regulation of Mitochondrial Oxidative Phosphorylation.  
699 *Cell Metab.* **26**, 633-647.e7 (2017).
- 700 66. Thiele, I. *et al.* A community-driven global reconstruction of human metabolism. *Nat.*  
701 *Biotechnol.* **31**, 419–425 (2013).
- 702 67. Jerby, L., Shlomi, T. & Ruppin, E. Computational reconstruction of tissue-specific  
703 metabolic models: application to human liver metabolism. *Mol. Syst. Biol.* **6**, (2010).
- 704 68. Poupin, N. *et al.* Large-Scale Modeling Approach Reveals Functional Metabolic Shifts  
705 during Hepatic Differentiation. *J. Proteome Res.* acs.jproteome.8b00524 (2018).  
706 doi:10.1021/acs.jproteome.8b00524
- 707 69. Verhaak, R. G. W. *et al.* Prediction of molecular subtypes in acute myeloid leukemia  
708 based on gene expression profiling. *Haematologica* **94**, 131–4 (2009).

- 709 70. Network, T. C. G. A. R. Genomic and Epigenomic Landscapes of Adult De Novo  
710 Acute Myeloid Leukemia. *N. Engl. J. Med.* **368**, 2059–2074 (2013).
- 711 71. Lu, C. *et al.* IDH mutation impairs histone demethylation and results in a block to cell  
712 differentiation. *Nature* **483**, 474–478 (2012).
- 713 72. Kernysky, A. *et al.* IDH2 mutation-induced histone and DNA hypermethylation is  
714 progressively reversed by small-molecule inhibition. *Blood* **125**, 296–303 (2015).
- 715 73. Viale, A. *et al.* Oncogene ablation-resistant pancreatic cancer cells depend on  
716 mitochondrial function. *Nature* **514**, 628–632 (2014).
- 717 74. Lee, E. A. *et al.* Targeting Mitochondria with Avocatin B Induces Selective Leukemia  
718 Cell Death. *Cancer Res.* **75**, 2478–2488 (2015).
- 719 75. Chou, A. P. *et al.* Identification of Retinol Binding Protein 1 Promoter  
720 Hypermethylation in Isocitrate Dehydrogenase 1 and 2 Mutant Gliomas. *JNCI J. Natl.*  
721 *Cancer Inst.* **104**, 1458–1469 (2012).
- 722 76. Guilhamon, P. *et al.* Meta-analysis of IDH-mutant cancers identifies EBF1 as an  
723 interaction partner for TET2. *Nat. Commun.* **4**, 2166 (2013).
- 724 77. Flavahan, W. A. *et al.* Insulator dysfunction and oncogene activation in IDH mutant  
725 gliomas. *Nature* **529**, 110–114 (2016).
- 726 78. Mazor, T. *et al.* Clonal expansion and epigenetic reprogramming following deletion or  
727 amplification of mutant IDH1. *Proc. Natl. Acad. Sci. U. S. A.* **114**, 10743–10748  
728 (2017).
- 729 79. Farshidfar, F. *et al.* Integrative Genomic Analysis of Cholangiocarcinoma Identifies  
730 Distinct IDH-Mutant Molecular Profiles. *Cell Rep.* **19**, 2878–2880 (2017).
- 731 80. Khurshed, M., Molenaar, R. J., Lenting, K., Leenders, W. P. & van Noorden, C. J. F. In  
732 silico gene expression analysis reveals glycolysis and acetate anaplerosis in IDH1 wild-  
733 type glioma and lactate and glutamate anaplerosis in IDH1-mutated glioma.  
734 *Oncotarget* **8**, 49165–49177 (2017).
- 735 81. Sriskanthadevan, S. *et al.* AML cells have low spare reserve capacity in their  
736 respiratory chain that renders them susceptible to oxidative metabolic stress. *Blood*  
737 **125**, 2120–30 (2015).
- 738 82. Baccelli, I. *et al.* Mubritinib Targets the Electron Transport Chain Complex I and  
739 Reveals the Landscape of OXPHOS Dependency in Acute Myeloid Leukemia. *Cancer*  
740 *Cell* **36**, 84-99.e8 (2019).
- 741 83. Bisailon, R. *et al.* Genetic characterization of ABT-199 sensitivity in human AML.  
742 *Leukemia* **1** (2019). doi:10.1038/s41375-019-0485-x
- 743 84. Wouters, B. J. Hitting the target in IDH2 mutant AML. *Blood* **130**, 693–694 (2017).
- 744 85. Ye, D., Guan, K.-L. & Xiong, Y. Metabolism, Activity, and Targeting of D- and L-2-  
745 Hydroxyglutarates. *Trends in cancer* **4**, 151–165 (2018).
- 746 86. Oizel, K. *et al.* D-2-Hydroxyglutarate does not mimic all the IDH mutation effects, in  
747 particular the reduced etoposide-triggered apoptosis mediated by an alteration in  
748 mitochondrial NADH. *Cell Death Dis.* **6**, e1704 (2015).
- 749 87. Nussinov, R., Tsai, C.-J. & Jang, H. Protein ensembles link genotype to phenotype.  
750 *PLOS Comput. Biol.* **15**, e1006648 (2019).
- 751 88. Letai, A. Functional precision cancer medicine—moving beyond pure genomics. *Nat.*  
752 *Med.* **23**, 1028–1035 (2017).
- 753 89. Saland, E. *et al.* A robust and rapid xenograft model to assess efficacy of  
754 chemotherapeutic agents for human acute myeloid leukemia. *Blood Cancer J.* **5**, e297  
755 (2015).
- 756 90. Sanchez, P. V *et al.* A robust xenotransplantation model for acute myeloid leukemia.  
757 *Leukemia* **23**, 2109–2117 (2009).
- 758 91. Sarry, J.-E. *et al.* Human acute myelogenous leukemia stem cells are rare and

- 759 heterogeneous when assayed in NOD/SCID/IL2R $\gamma$ c-deficient mice. *J. Clin. Invest.*  
760 **121**, 384–95 (2011).
- 761 92. Mookerjee, S. A., Gerencser, A. A., Nicholls, D. G. & Brand, M. D. Quantifying  
762 intracellular rates of glycolytic and oxidative ATP production and consumption using  
763 extracellular flux measurements. *J. Biol. Chem.* **292**, 7189–7207 (2017).
- 764 93. Zur, H., Ruppin, E. & Shlomi, T. iMAT: an integrative metabolic analysis tool.  
765 *Bioinformatics* **26**, 3140–3142 (2010).
- 766 94. Chazalviel, M. *et al.* MetExploreViz: web component for interactive metabolic  
767 network visualization. *Bioinformatics* **34**, 312–313 (2018).
- 768 95. Cottret, L. *et al.* MetExplore: a web server to link metabolomic experiments and  
769 genome-scale metabolic networks. *Nucleic Acids Res.* **38**, W132–W137 (2010).
- 770 96. Tyner, J. W. *et al.* Functional genomic landscape of acute myeloid leukaemia. *Nature*  
771 **562**, 526–531 (2018).
- 772 97. Subramanian, A. *et al.* Gene set enrichment analysis: a knowledge-based approach for  
773 interpreting genome-wide expression profiles. *Proc. Natl. Acad. Sci. U. S. A.* **102**,  
774 15545–50 (2005).
- 775 98. Mootha, V. K. *et al.* PGC-1 $\alpha$ -responsive genes involved in oxidative phosphorylation  
776 are coordinately downregulated in human diabetes. *Nat. Genet.* **34**, 267–273 (2003).
- 777
- 778

## 779 **Figure legends**

780

781 **Figure 1. IDH1 mutant cells exhibit a higher susceptibility to OxPHOS<sub>i</sub> and BCL2<sub>i</sub> is**  
782 **linked to their enhanced mitochondrial capabilities and OxPHOS activity in AML.**

783 **(a)** Schematic representation of the electron transport chain (ETC) and BCL2 with OxPHOS<sub>i</sub>  
784 and BCL2<sub>i</sub> used in this study (Metf= metformin; AA=antimycin A; ATVQ=atovaquone;  
785 oligo=oligomycin).

786 **(b)** Plots of EC<sub>50</sub> values from ATP viability assays of metformin and ABT-263 after 48h,  
787 from annexin V positive cells assays of ABT-199 after 24h and percent of viable cells after  
788 72h of IACS-010759 in primary samples with WT or MUT IDH1 (red circles) or IDH2  
789 (burgundy circles). See also Supplementary Table 1 for patient information.

790 **(c)** Apoptosis induction following IACS-010759 (100nM during 48h for HL60 and during 6  
791 days for MOLM14), 48h metformin (10mM), antimycin A (10 $\mu$ M), atovaquone (20 $\mu$ M for  
792 HL60 and 40  $\mu$ M for MOLM14), oligomycin (2 $\mu$ M) and ABT-199 (200nM) in HL60 and  
793 MOLM14 IDH1 WT or R132H. Errors bars indicate Mean $\pm$ SEM of at least three independent  
794 experiments.

795 **(d)** 2-HG fold change following 24h treatment with metformin (10mM) and ABT-199  
796 (200nM) in HL60 and MOLM14 IDH1 WT or R132H. Errors bars indicate Mean±SEM of at  
797 least two independent experiments.

798 **(e)** TMRE mitochondrial potential assay in HL60 and MOLM14 IDH1 WT or R132H  
799 measured *in vitro* (n≥3) and *in vivo* in PDX (3 patients IDH1 WT and 3 patients IDH1 MUT)  
800 to estimate Mitochondrial Membrane Potential (MMP). See also Supplementary Table 1 for  
801 patient information. Errors bars indicate Mean±SEM.

802 **(f)** Mitochondrial Oxygen Consumption Rate (OCR) of HL60 and MOLM14 IDH1 WT or  
803 R132H measured *in vitro* (n≥3) and *ex vivo* in PDX after cell-sorting (4 patients IDH1 WT  
804 and 2 patients IDH1 MUT). See also Supplementary Table 1 for patient information. Errors  
805 bars indicate Mean±SEM.

806 **(g)** Mitochondrial ATP in HL60 and MOLM14 IDH1 WT and R132H (n≥3) and in patients  
807 with IDH WT (n=14) or MUT IDH1 (red circles) or IDH2 (burgundy circles) (n=21). See also  
808 Supplementary Table 1 for patient information. Errors bars indicate Mean±SEM.

809 **(h)** Mitochondrial ETC complex activities in HL60 and MOLM14 IDH1 WT and R132H.  
810 Errors bars indicate Mean±SEM of at least three independent experiments.

811 **(i)** NADH-producing enzyme activities of malate dehydrogenase (MDH) and isocitrate  
812 dehydrogenase (IDH3) in HL60 and MOLM14 IDH1 WT and R132H. Errors bars indicate  
813 Mean±SEM of at least three independent experiments.

814 **(j)** Succinate (succ), fumarate (fum), malate (mal), cis-aconitate (cis-aco), citrate (cit) and  $\alpha$ -  
815 KG amounts measured over 24h culture in HL60 and MOLM14 IDH1 WT and R132H.  
816 Errors bars indicate Mean±SEM of at least three independent experiments.

817 **(k)** Plots of EC<sub>50</sub> values of AraC determined from ATP viability assays at 48h (left panel) and  
818 total number of human viable AML cells expressing CD45 and CD33 in AraC-treated

819 compared with PBS-treated IDH1 mutant AML-xenografted mice in bone marrow and spleen  
820 (right panel). See also Supplementary Table 1 for patient information.

821 For each panel (**b–k**), HL60 IDH1 WT are represented in blue by circles (clone 4), triangles  
822 up (clone 2) and triangles down (clone 7) whereas R132H are represented in red by circles  
823 (clone 11) and triangles up (clone 5). MOLM14 are represented by squares, blue for IDH1  
824 WT and red for IDH1 R132H (both induced by doxycycline). Groups were compared with  
825 unpaired two-tailed t test with Welch's correction. \* $p < 0.05$ ; \*\* $p < 0.01$ ; \*\*\* $p < 0.001$ ; ns, not  
826 significant.

827

828 **Figure 2. Methylation- and CEBP $\alpha$ - dependent mitochondrial fatty acid oxidation is**

829 **increased in IDH1 mutant cells.**

830 **(a)** Comparison of the predicted activity of reactions in the metabolic network of HL60 IDH1  
831 WT vs. R132H cells. Predictions of reactions activity or inactivity was made using the Recon  
832 2 metabolic network reconstruction and transcriptomic data from HL60 IDH1 WT and  
833 R123H<sup>23</sup>. Pathway enrichment was performed on the set of reactions identified as specifically  
834 active (red) or specifically inactive (blue) in R123H cells. Corrected  $p$ -values were obtained  
835 by performing a hypergeometric test followed by a Bonferroni correction.

836 **(b)** Visualization of modulated reactions within the fatty acid oxidation pathway of the Recon  
837 2 metabolic network. Reactions predicted to be specifically active (red) or inactive (blue) in  
838 R123H cells based on transcriptomic data alone (left panel) or using the computational  
839 modeling approach (right panel) were mapped using the MetExplore webserver<sup>94,95</sup>.

840 **(c)** Acetyl-CoA, succinyl-CoA, free coenzyme A (CoASH) amounts measured over 24h  
841 culture in HL60 IDH1 WT clone 4 and R132H clone 11 lysates. Errors bars indicate  
842 Mean $\pm$ SEM of two independent experiments with 2 technical replicates for each analyzed  
843 with unpaired two-tailed t test with Welch's correction.

844 **(d)**  $^{14}\text{C}$  palmitate oxidation by HL60 IDH1 WT clone 4 (circle) and 2 (triangle) and R132H  
845 clone 11 (circle) and 5 (triangle) to assess  $\beta$ -oxidation rate. Errors bars indicate Mean $\pm$ SEM  
846 of six independent experiments analyzed with unpaired two-tailed t test with Welch's  
847 correction.

848 **(e)** *CPT1a* gene expression across AML patient samples from GSE14468 (Verhaak cohort)  
849 and BeatAML<sup>96</sup> datasets in function of their IDH1 status. Groups were compared using  
850 unpaired non-parametric Mann-Whitney test.

851 **(f)** Total lysates (left panel) and lysates of purified mitochondria (mito) (right panel) of HL60  
852 and MOLM14 IDH1 WT and R132H and total lysates of primary samples IDH1 WT or MUT  
853 (bottom left panel) were immunoblotted with the indicated antibodies. See also  
854 Supplementary table 1 for patient information.

855 **(g)** Normalized enrichment score (NES) following GSEA analysis of patients with high or  
856 low expression of *CPT1a* (median as the reference) in IDH WT, IDH1 mutant or IDH1+2  
857 mutant across AML transcriptomes from two-independent cohorts, BeatAML and Verhaak  
858 (GSE14468).

859 **(h)** qChIP experiments showing the relative recruitment of CEBP $\alpha$  on *CPT1a*, *CPT2* and  
860 *SLC25A20* locus in mutant IDH1 R132H *versus* IDH1 WT HL60 and MOLM14, as indicated.  
861 Results were represented as the relative ratio between the mean value of immunoprecipitated  
862 chromatin (calculated as a percentage of the input) with the indicated antibodies and the one  
863 obtained with a control irrelevant antibody. HL60 IDH1 WT are represented in blue by circles  
864 (clone 4) and triangles (clone 2) whereas R132H are represented in red by circles (clone 11)  
865 and triangles (clone 5). MOLM14 are represented by squares, blue for IDH1 WT and red for  
866 IDH1 R132H (both induced by doxycycline). Errors bars indicate Mean $\pm$ SEM of at least two  
867 independent experiments analyzed with unpaired two-tailed t test with Welch's correction.  
868 \* $p < 0.05$ ; \*\* $p < 0.01$ ; \*\*\* $p < 0.001$ ; \*\*\*\* $p < 0.0001$ ; ns, not significant.

869  
870

871 **Figure 3. IDH mutant inhibitors reverse 2-HG production but do not necessarily**  
872 **decrease high OxPHOS phenotype and mitochondrial metabolism.**

873 **(a)** GSEA Normalized Enrichment Score (NES) from several transcriptomic signatures of  
874 AML patients with IDH mutation characterized as responders to IDHm inhibitor before  
875 treatment (8 patients), at complete remission CR (6 patients) and at relapse (5 patients); or as  
876 non-responders to IDHm inhibitor (2 patients) before and after treatment with IDHm  
877 inhibitor. See also Supplementary table 1 for patient information.

878 **(b)** Relative mRNA levels for *CPT1a*, *CPT2*, and *SLC25A20* in AML patients with IDH  
879 mutation characterized as responders to IDHm inhibitor before treatment (8 patients), at  
880 complete remission CR (6 patients) and at relapse (5 patients).

881 **(c)** FAO-linked OCR in HL60 and MOLM14 IDH1 R132H following 1-week treatment with  
882 AGI-5198 (2 $\mu$ M). Errors bars indicate Mean $\pm$ SEM of four independent experiments.

883 **(d)** Mitochondrial OCR of HL60 and MOLM14 IDH1 R132H in vehicle (DMF) and after  
884 24h, 1 week or 2 weeks treatment with AGI-5198 (2 $\mu$ M). Errors bars indicate Mean $\pm$ SEM of  
885 at least three independent experiments.

886 **(e)** ATP-linked OCR of HL60 and MOLM14 IDH1 R132H in vehicle (DMF) and after 24h, 1  
887 week or 2 weeks treatment with AGI-5198 (2 $\mu$ M). Errors bars indicate Mean $\pm$ SEM of at least  
888 three independent experiments.

889 **(f)** Citrate, succinate, malate and fumarate levels normalized to internal standard measured  
890 over 24h culture in HL60 and MOLM14 IDH1 R132H following 24h, 1 week or 2 weeks  
891 treatment with AGI-5198 (2 $\mu$ M- plain symbols) or AG-120 (1 $\mu$ M-empty symbols). HL60  
892 IDH1 R132H are represented in red by circles (clone 11) and triangles (clone 5), whereas  
893 MOLM14 IDH1 R132H are represented by red squares. Errors bars indicate Mean $\pm$ SEM of at  
894 least three independent experiments.

895 For panels (c–g), groups were compared with unpaired two-tailed t test with Welch's  
896 correction. \* $p < 0.05$ ; \*\* $p < 0.01$ ; \*\*\* $p < 0.001$ ; ns, not significant.

897

898 **Figure 4. Treatment with an OxPHOS inhibitor enhances anti-leukemic effects of IDH-**  
899 **mutant specific inhibitors alone and in combination with cytarabine in a high engrafter**  
900 **IDH1 mutant AML PDX model.**

901 (a) Experimental scheme detailing administration time of intraperitoneal AraC, IACS 010759  
902 and AG-120 by gavages in PDX. See also Supplementary table 1 for patient information.

903 (b) AG-120 concentration in mice sera of PDX 325.

904 (c) 2-HG level normalized to control group in sera of IDH1 R132 PDX 325 mice after mono-,  
905 duplet- or triplet-therapies compared with vehicle.

906 (d) Total number of human viable AML cells expressing CD45 and CD33 in mono-, duplet-  
907 or triplet-therapies compared with vehicle and AraC-treated IDH1 R132 PDX 325 mice in  
908 bone marrow and spleen. Fold change (FC) between each group and the mean of vehicle or  
909 AraC group.

910 (e) Percent of human viable cells expressing CD15 in bone marrow in mono-, duplet- or  
911 triplet-therapies compared with vehicle-treated IDH1 R132 PDX 325 mice.

912 (f) Percent of mitochondrial ATP contribution to total ATP after FACS-sorting of human  
913 viable cells expressing CD45 and CD33 in bone marrow of IDH1 R132 PDX 325 mice  
914 treated with mono-, duplet- or triplet-therapies compared with vehicle.

915 (g) Aspartate and lactate levels normalized to control group in mice sera of IDH1 R132 PDX  
916 325.

917 (h) Schematic diagram of metabolic reprogramming induced by IDH1 mutation in AML cells  
918 and its impact on OxPHOS status through FAO regulation in absence of treatment, after  
919 treatment with IDHm inhibitor then at relapse.



920 For panels **(b–g)**, groups were compared with unpaired two-tailed t test with Welch's  
921 correction. \* $p < 0.05$ ; \*\* $p < 0.01$ ; \*\*\* $p < 0.001$ ; \*\*\*\* $p < 0.0001$ ; ns, not significant.

**a**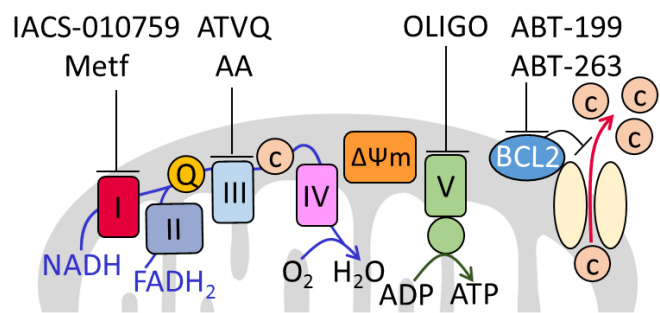**b**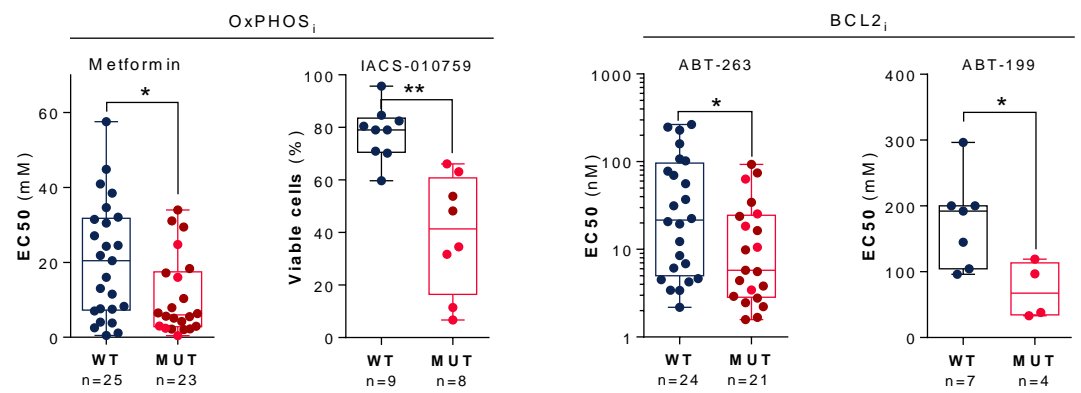

bioRxiv preprint doi: <https://doi.org/10.1101/749580>; this version posted August 28, 2019. The copyright holder for this preprint (which was not certified by peer review) is the author/funder. All rights reserved. No reuse allowed without permission.

**c**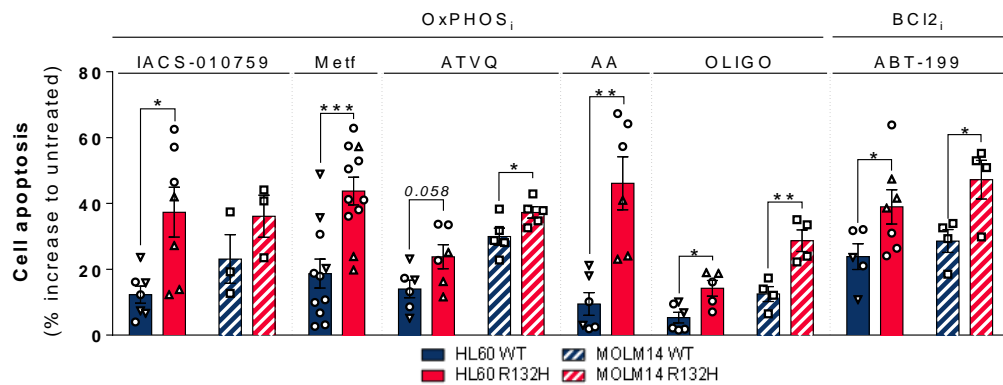**d**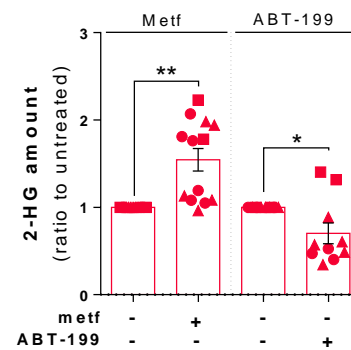**e**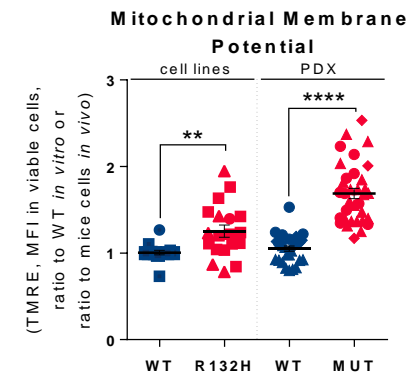**f**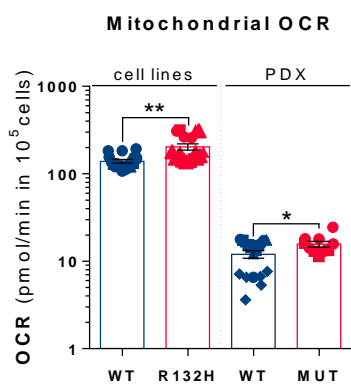**g**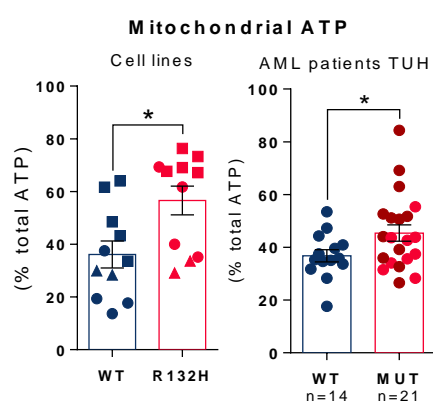**h**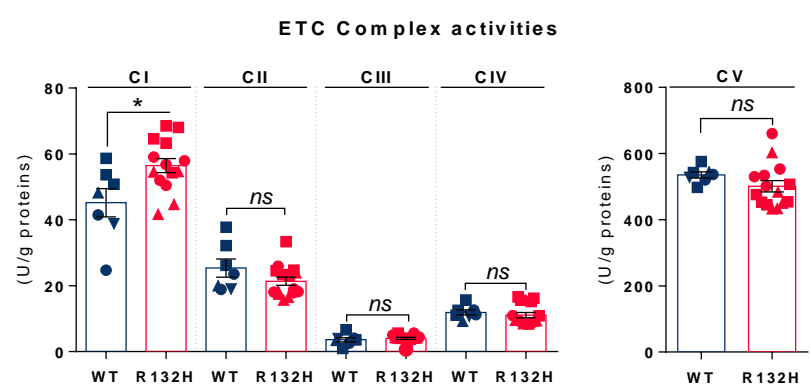**i**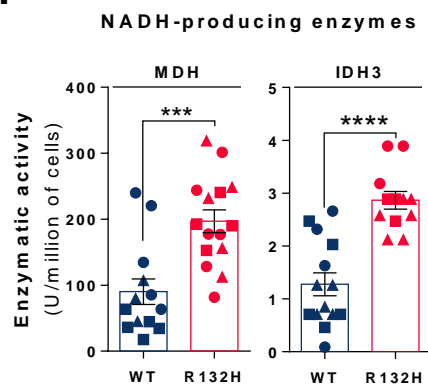**j**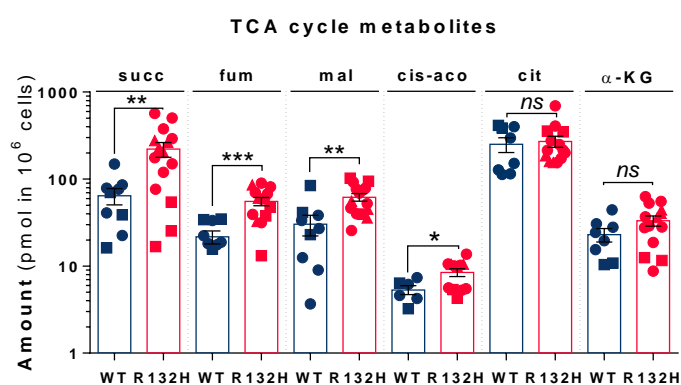**k**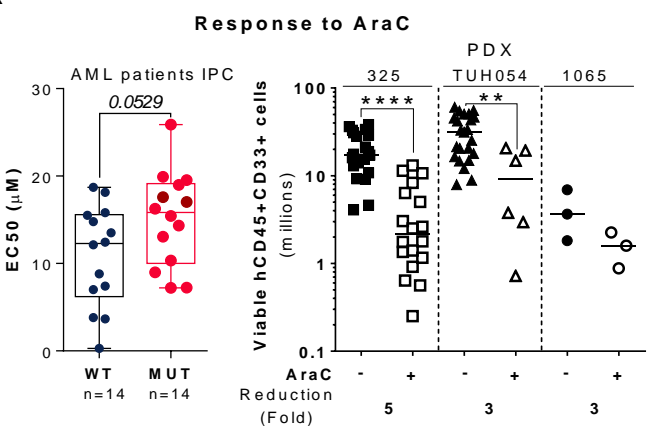

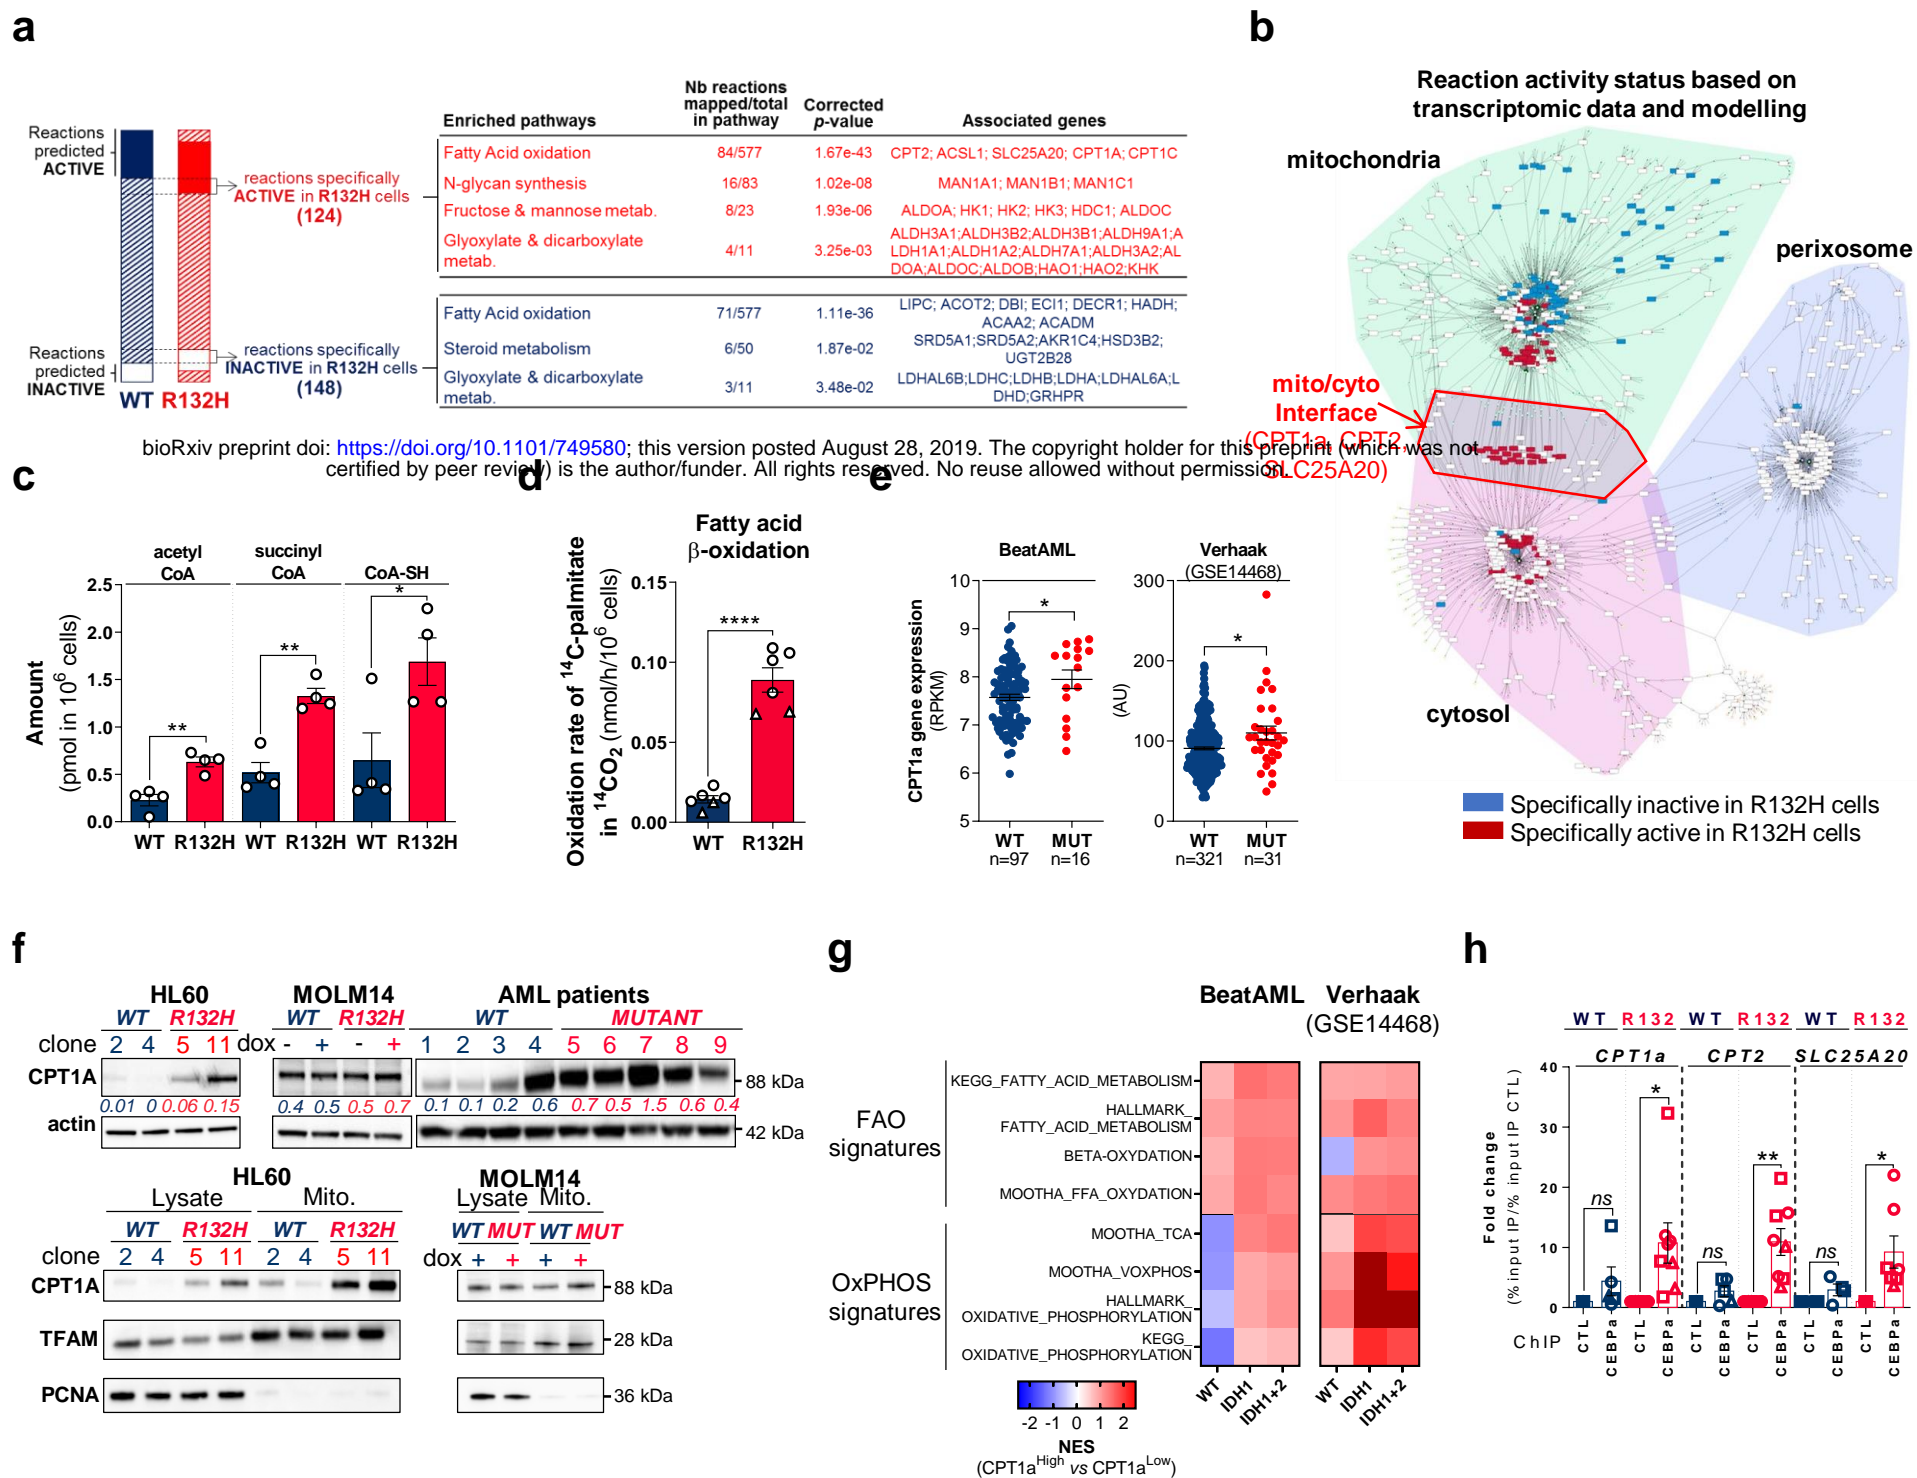

Fig 2.

**a****AML patients treated with IDHmutant inhibitors (MDACC)**

GSEA - NES

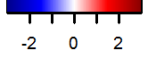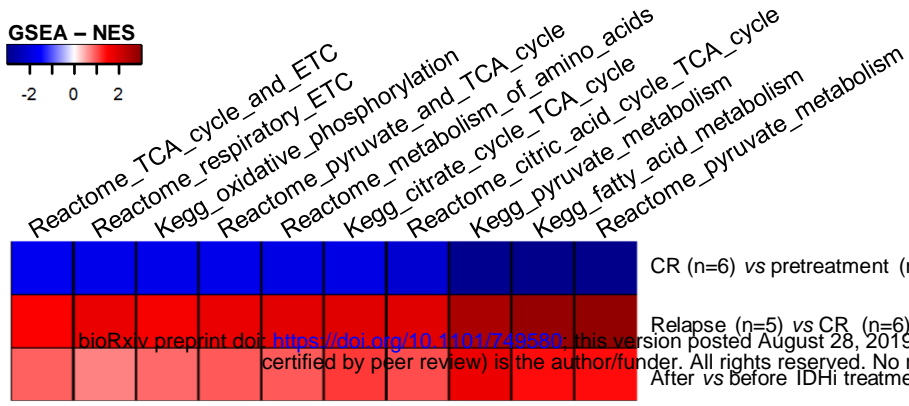*in responders to IDH<sup>m</sup>*

bioRxiv preprint doi: <https://doi.org/10.1101/749580>; this version posted August 28, 2019. The copyright holder for this preprint (which was not certified by peer review) is the author/funder. All rights reserved. No reuse allowed without permission.

*in non-responders to IDH<sup>m</sup>***b****FAO genes in patients treated with IDHmutant inhibitors (MDACC)**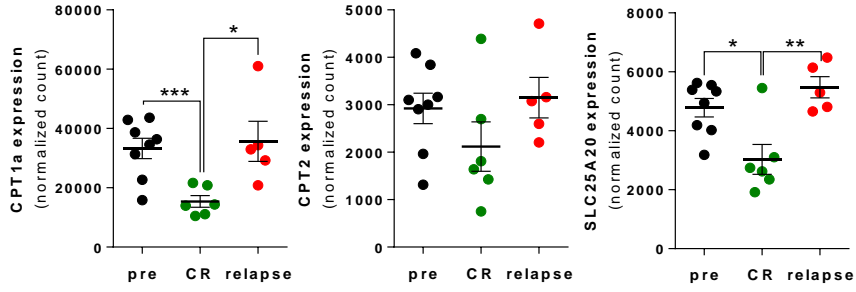**c****FAO-linked OCR**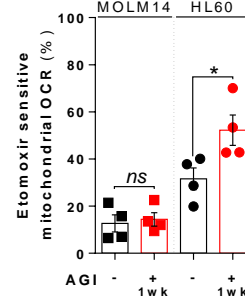**d****Mitochondrial OCR**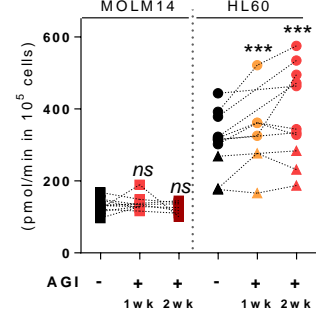**e****ATP-linked OCR**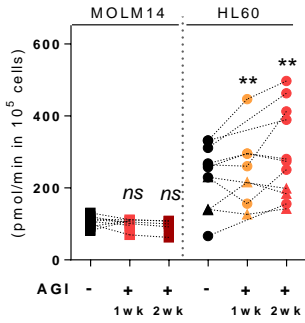**f**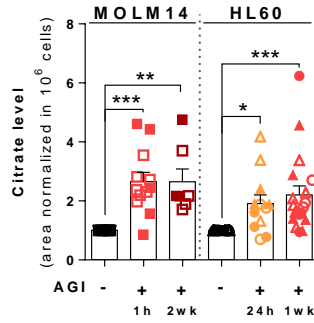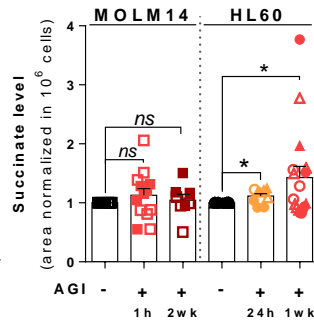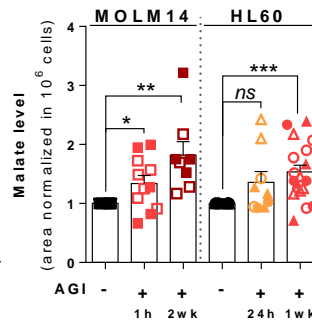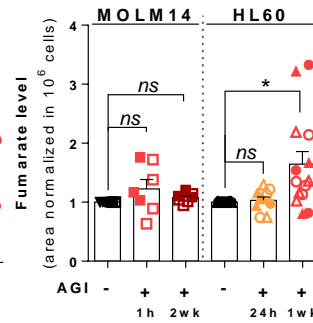

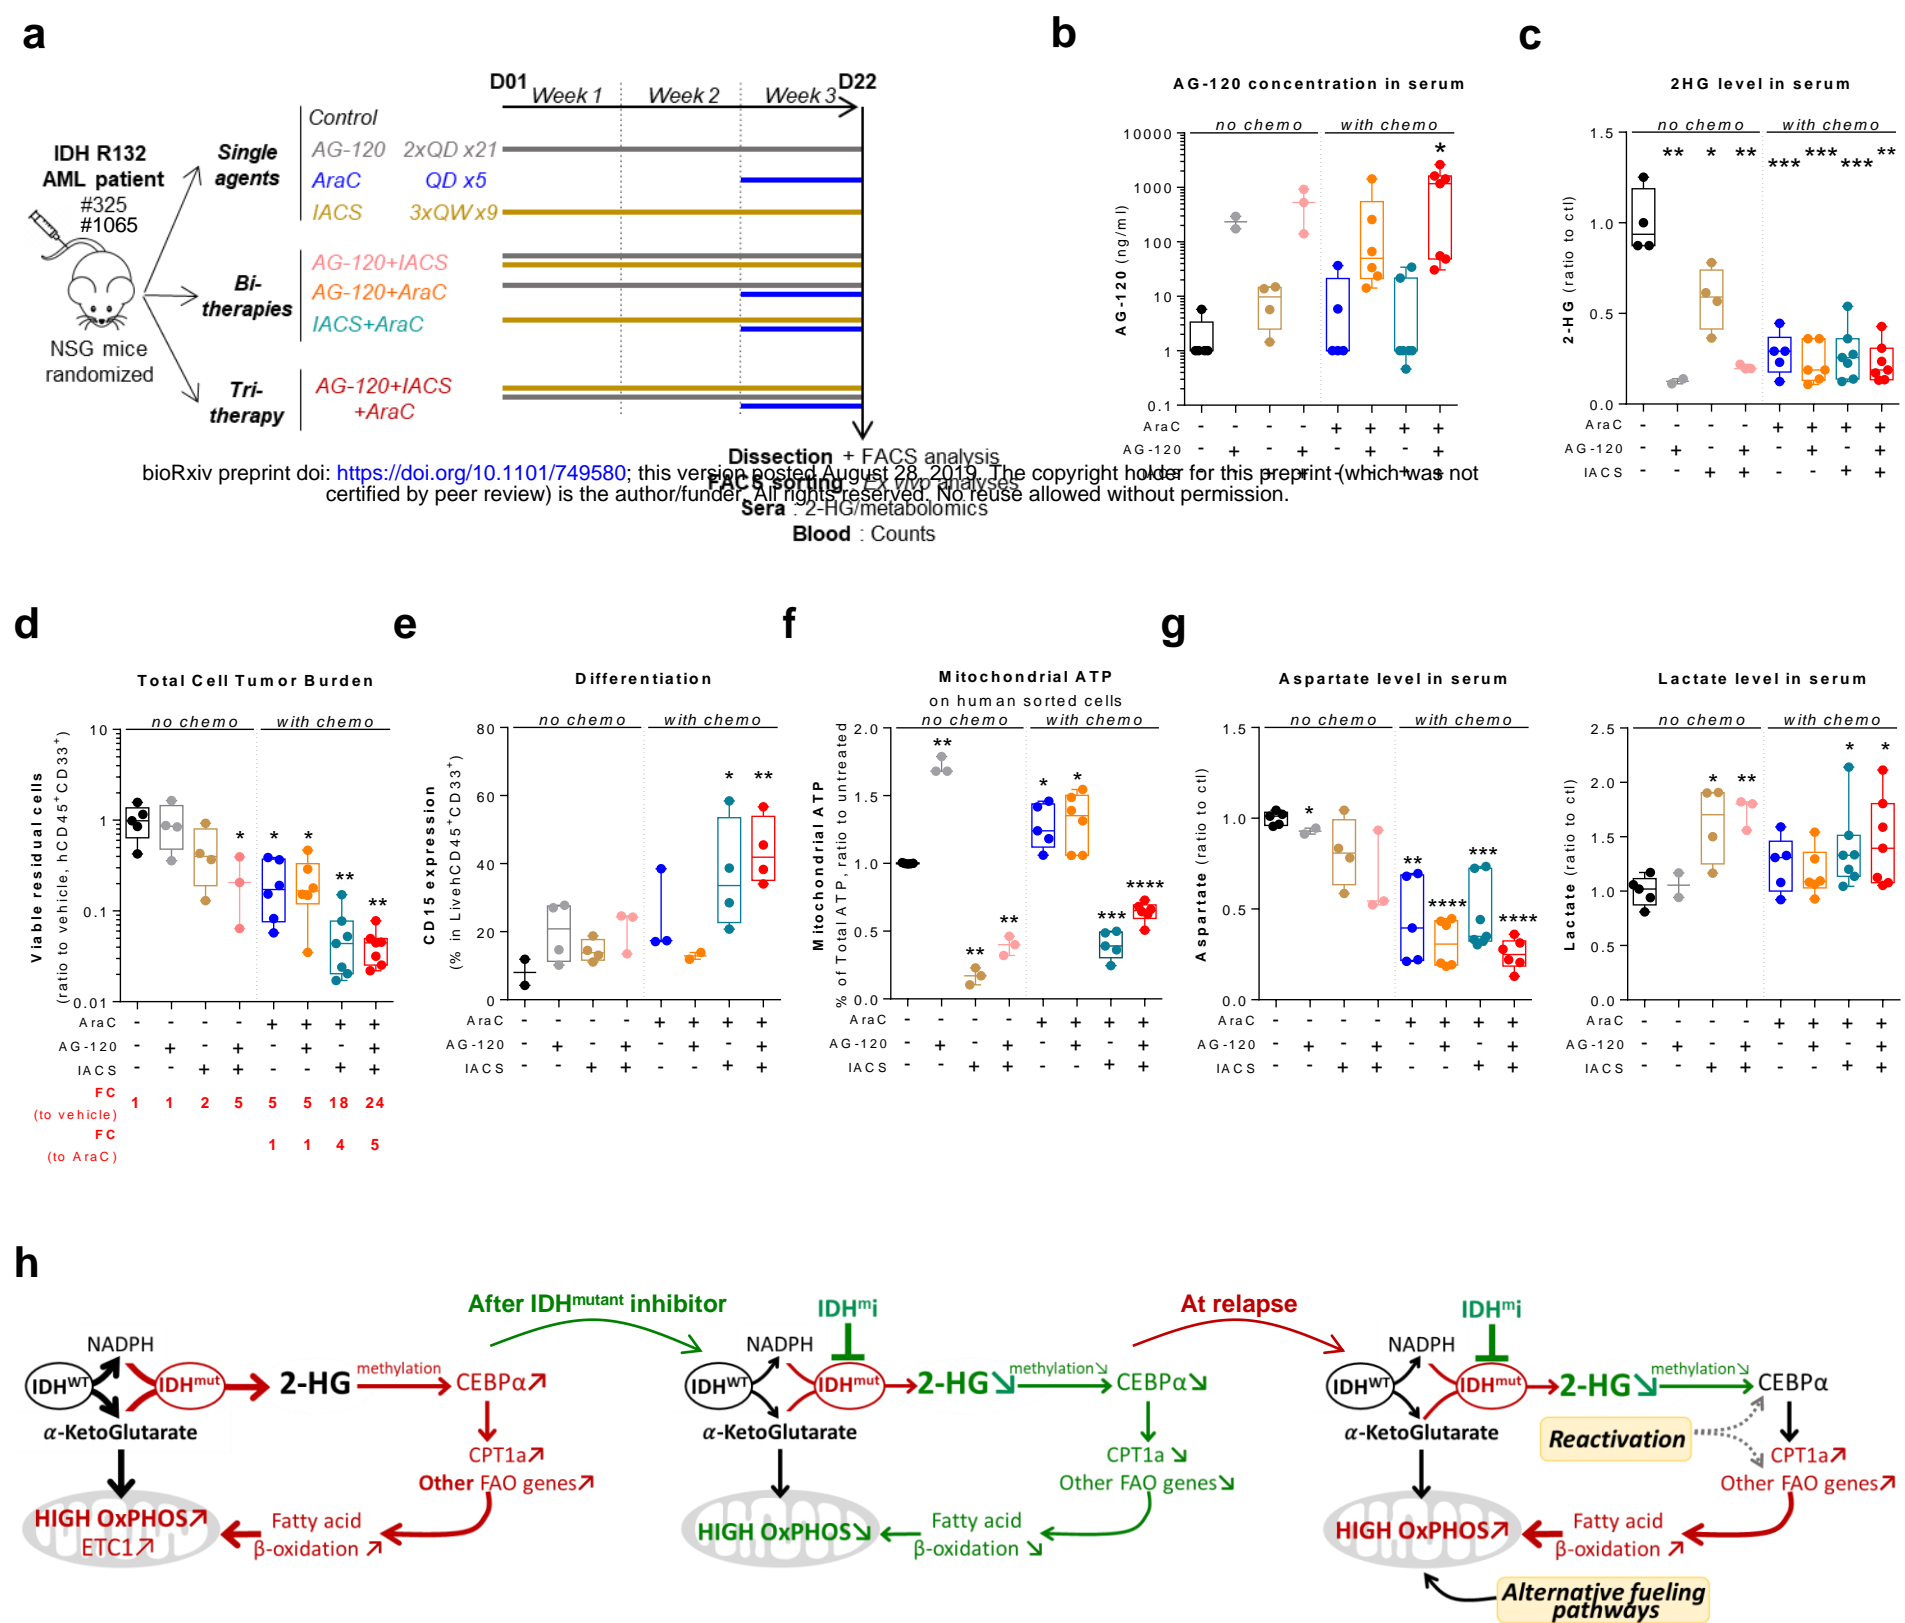

**Fig 4.**
